# Supplementary material for: Microwave-assisted multicomponent synthesis of antiproliferative 2,4-dimethoxy-tetrahydropyrimido[4,5-b]quinolin-6(7H)-ones
Source: Royal Society of Chemistry journal article supplement (doi:10.1039/d2ra04669e), 2022-01-01
Supplement: d2ra04669e1.pdf [file d2ra04669e1.pdf]

## Supporting Information

### Microwave-assisted multicomponent synthesis of antiproliferative 2,4-dimethoxy-tetrahydropyrimido[4,5-b]quinolin-6(7H)-ones

Subham G. Patel,<sup>a</sup> Aday González-Bakker,<sup>b</sup> Raturajsinh M. Vala,<sup>a</sup> Paras J. Patel,<sup>a</sup> Adrián Puerta,<sup>b</sup> Apoorva Malik,<sup>c</sup> Rakesh K Sharma,<sup>c</sup> José M. Padrón,<sup>b</sup> and Hitendra M. Patel <sup>a\*</sup>

<sup>a</sup> Department of Chemistry, Sardar Patel University, Vallabh Vidyanagar, 388120, Gujarat, India

<sup>b</sup> BioLab, Instituto Universitario de Bio-Orgánica Antonio González (IUBO-AG), Universidad de La Laguna, E-38206 La Laguna, Spain

<sup>c</sup> Sustainable Materials and Catalysts Research Laboratory (SMCRL), Department of Chemistry, Indian Institute of Technology, Jodhpur, India

\* Corresponding Author: Hitendra M. Patel, E-mail: [hm\\_patel@spuvvn.edu](mailto:hm_patel@spuvvn.edu).

#### Table of Contents

| Sr. No. | Content                                                                                               | Page No. |
|---------|-------------------------------------------------------------------------------------------------------|----------|
| 1       | <sup>1</sup> H-NMR, <sup>13</sup> C{ <sup>1</sup> H}-NMR Spectral data of all Compounds <b>4(a-v)</b> | S2-S23   |
| 2       | HRMS and LCMS Spectral data of all Compounds <b>4(a-v)</b>                                            | S24-S34  |
| 3       | Single-crystal X-ray diffraction data of compound <b>4f</b> and <b>4o</b>                             | S35-S38  |
| 4       | Green Matrix calculation                                                                              | S39-S41  |

Figure S1:  $^1\text{H-NMR}$  (500 MHz,  $\text{CDCl}_3$ ) of Compound 4a.

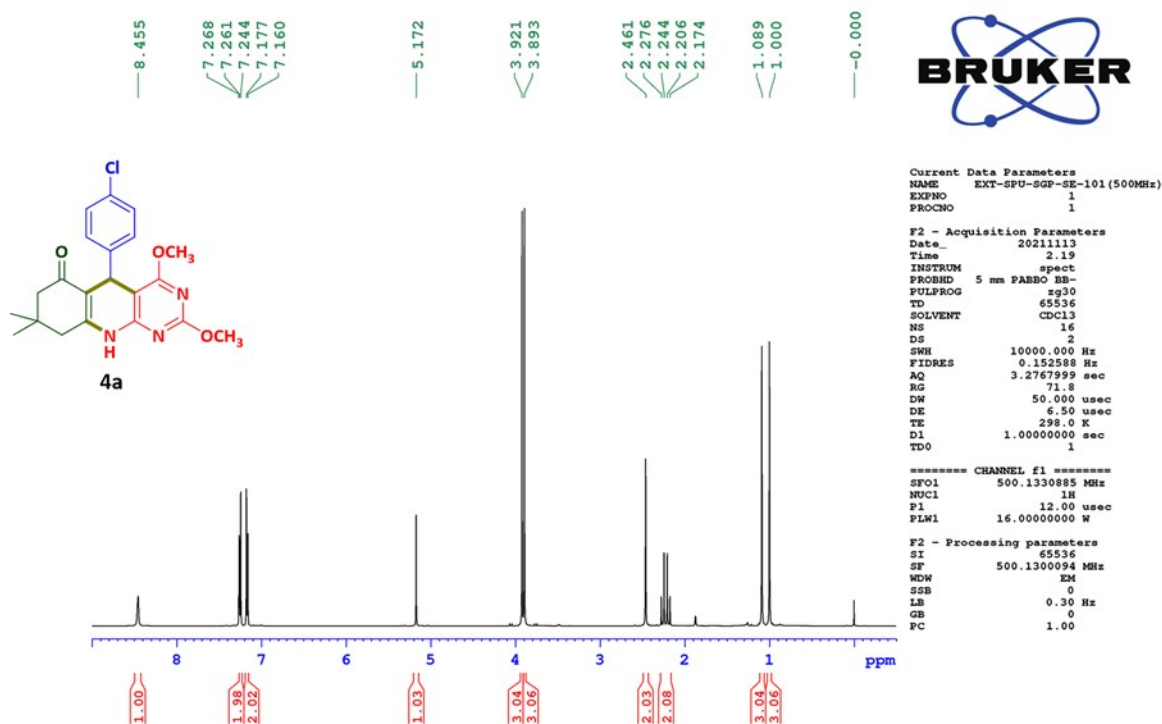

Figure S2:  $^{13}\text{C-NMR}$  (125 MHz,  $\text{CDCl}_3$ ) of Compound 4a.

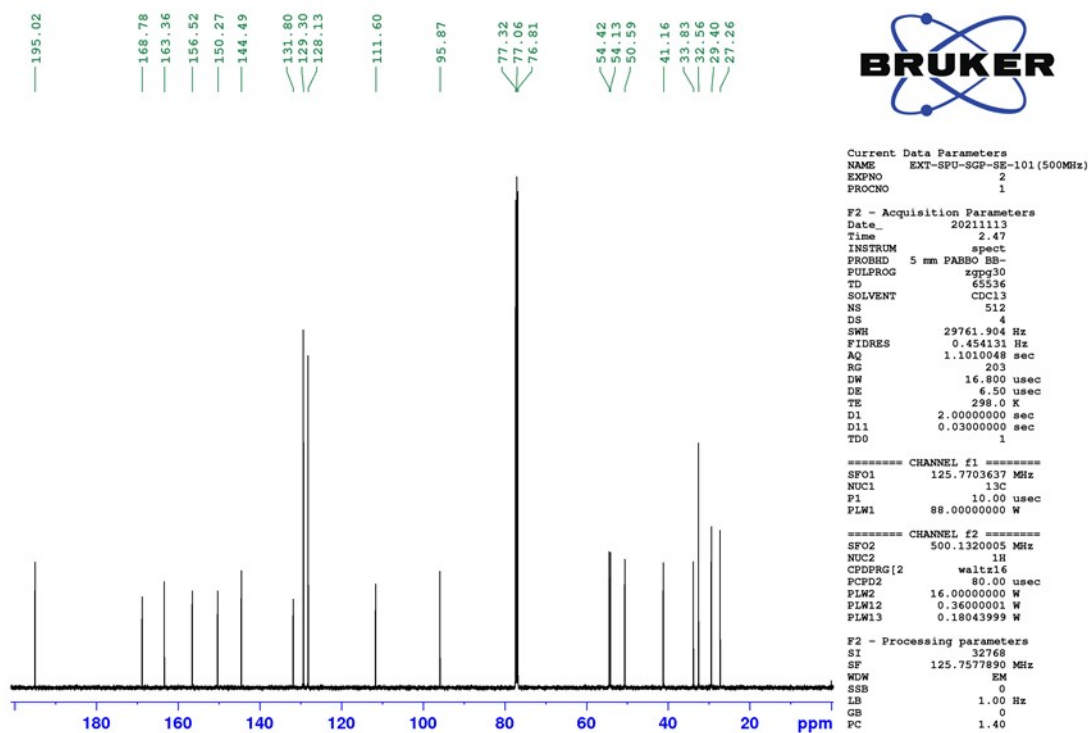

Figure S3: <sup>1</sup>H-NMR (500 MHz, CDCl<sub>3</sub>) of Compound 4b.

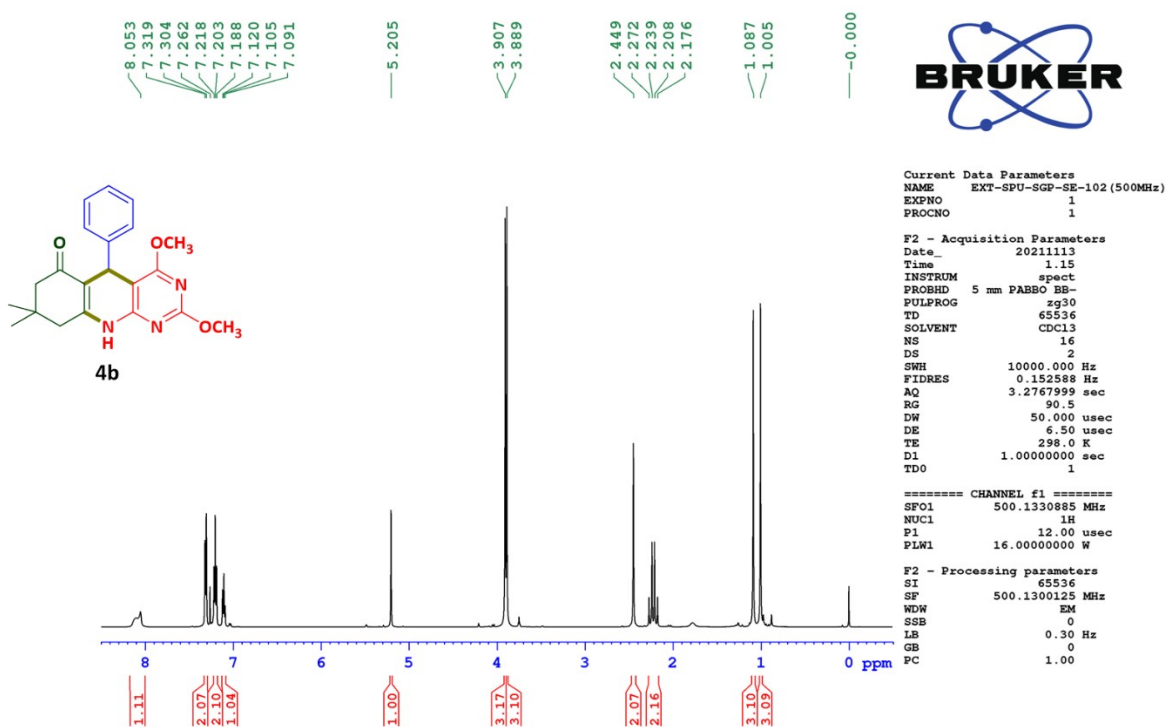

Figure S4: <sup>13</sup>C-NMR (125 MHz, CDCl<sub>3</sub>) of Compound 4b.

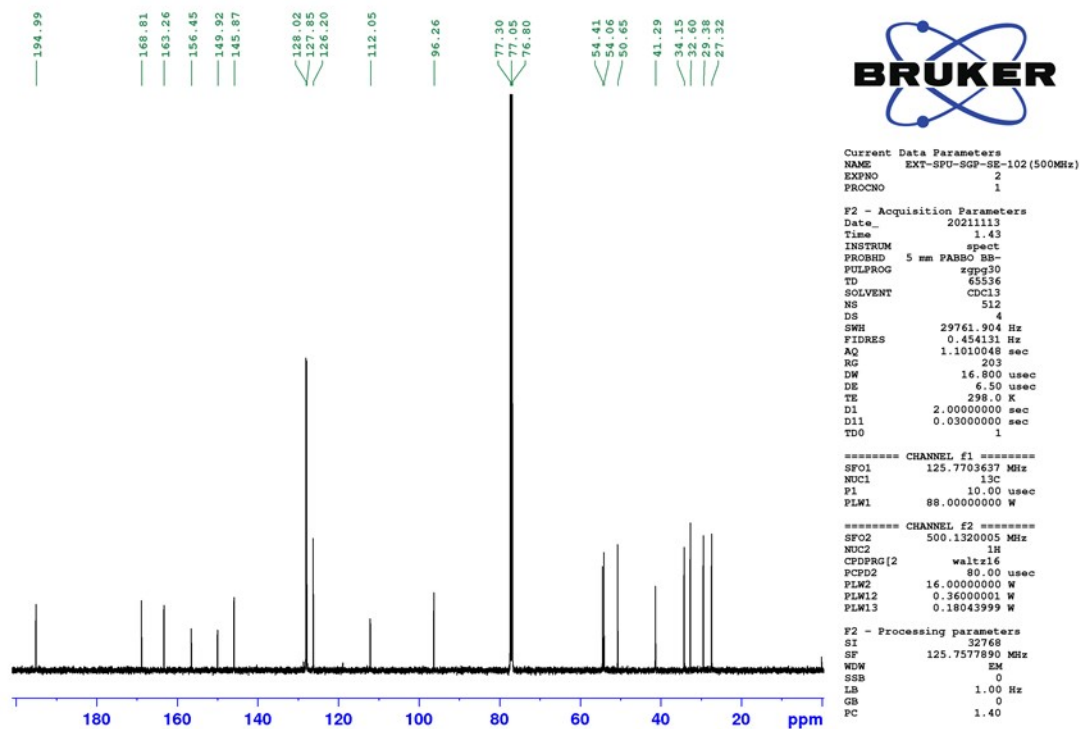

Figure S5:  $^1\text{H-NMR}$  (500 MHz,  $\text{CDCl}_3$ ) of Compound 4c.

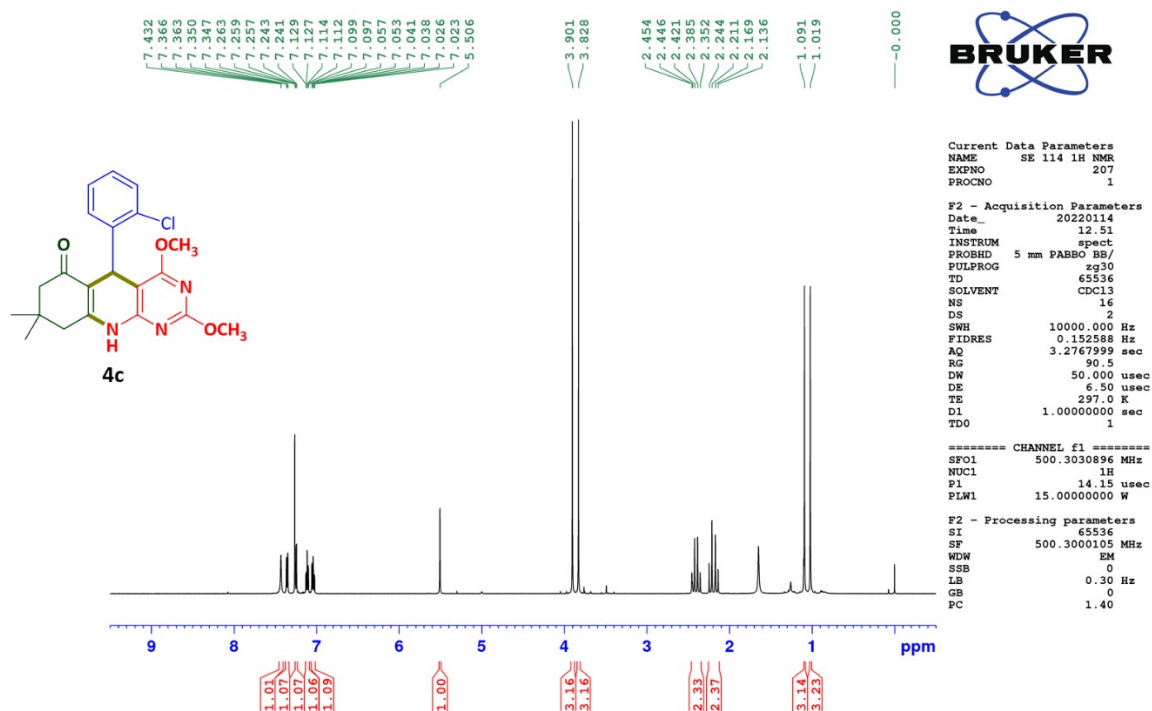

Figure S6:  $^{13}\text{C-NMR}$  (125 MHz,  $\text{CDCl}_3$ ) of Compound 4c.

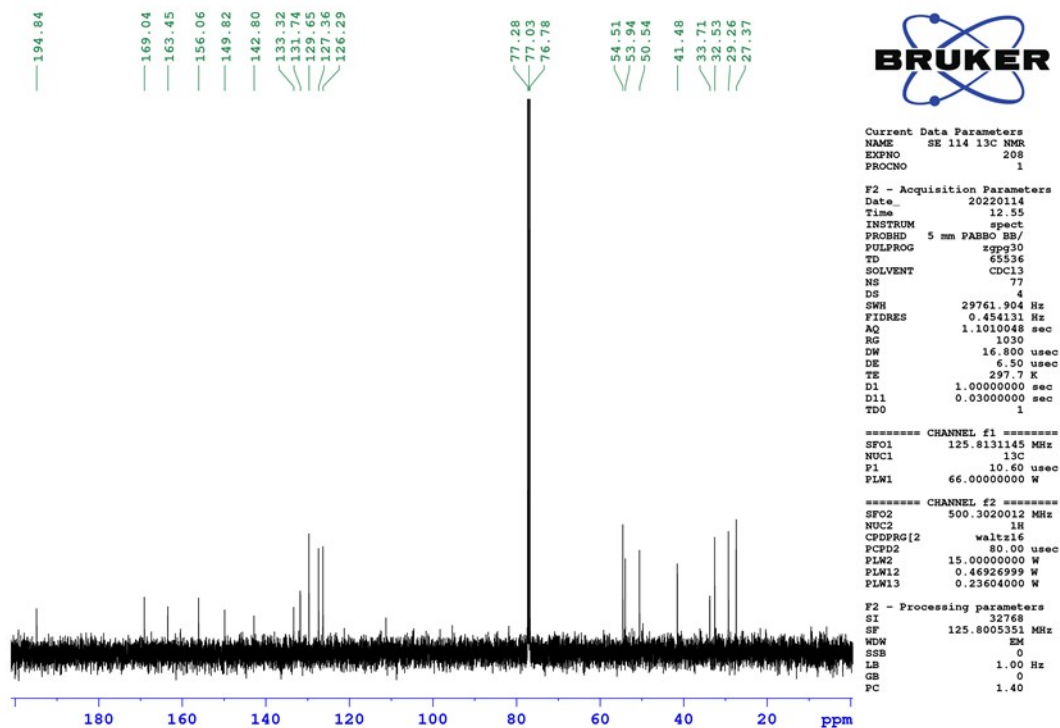

Figure S7:  $^1\text{H-NMR}$  (500 MHz,  $\text{CDCl}_3$ ) of Compound 4d.

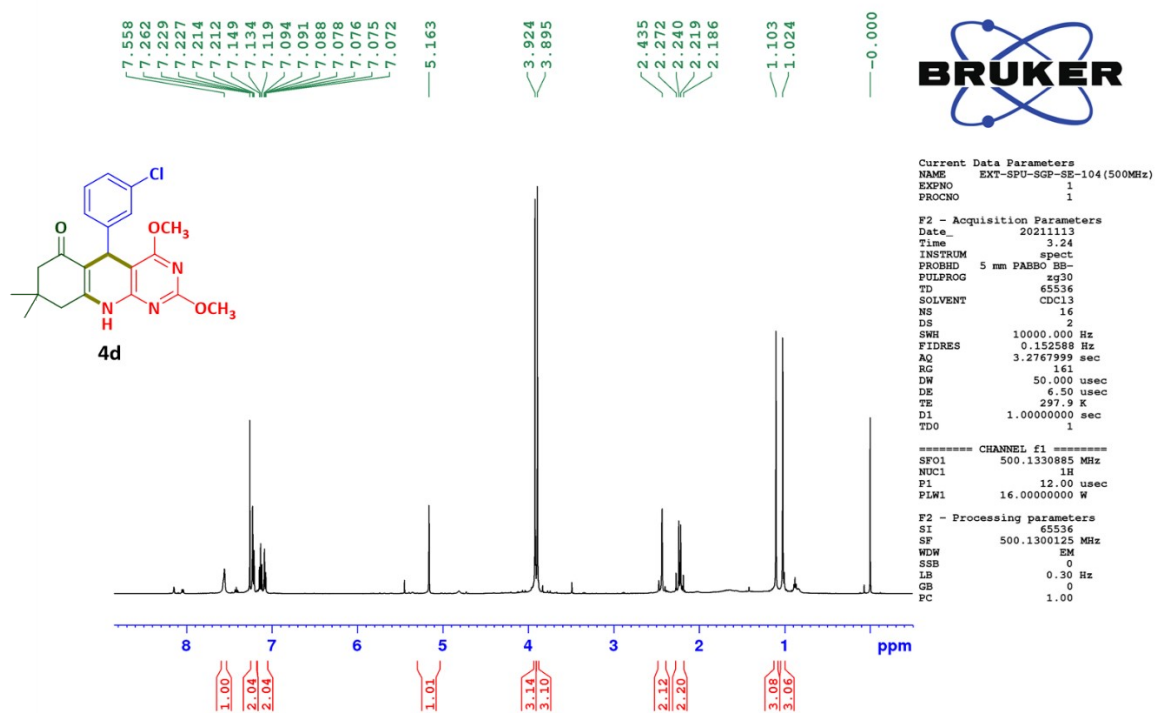

Figure S8:  $^{13}\text{C-NMR}$  (125 MHz,  $\text{CDCl}_3$ ) of Compound 4d.

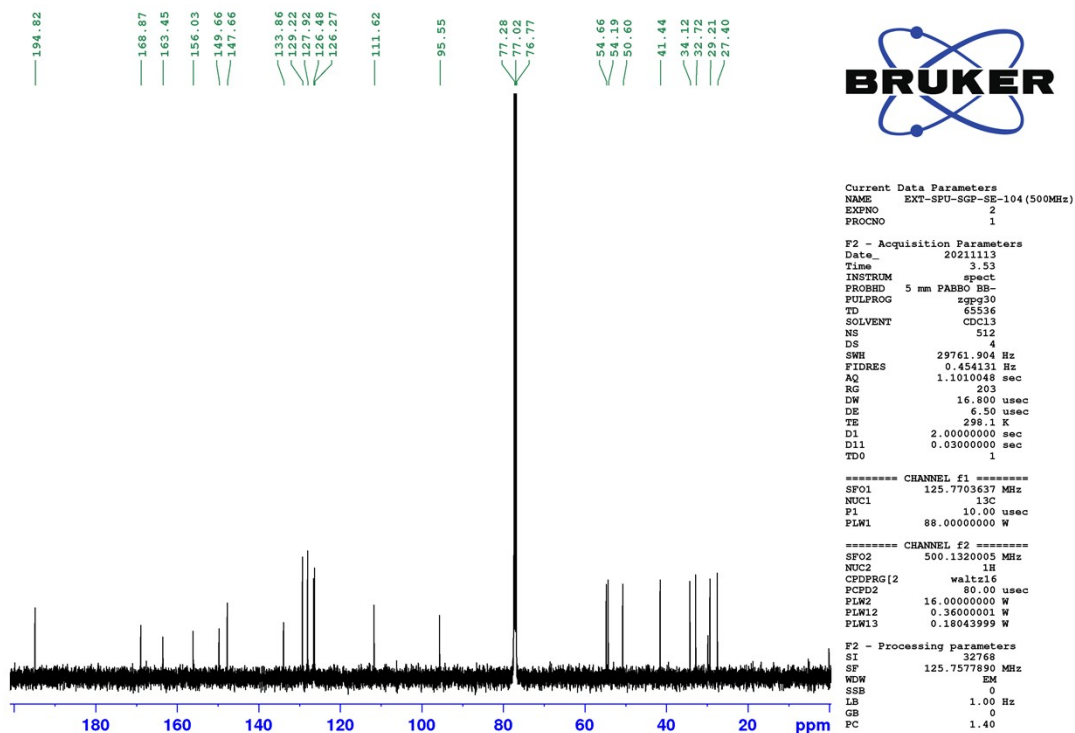

Figure S9:  $^1\text{H-NMR}$  (500 MHz,  $\text{CDCl}_3$ ) of Compound 4e.

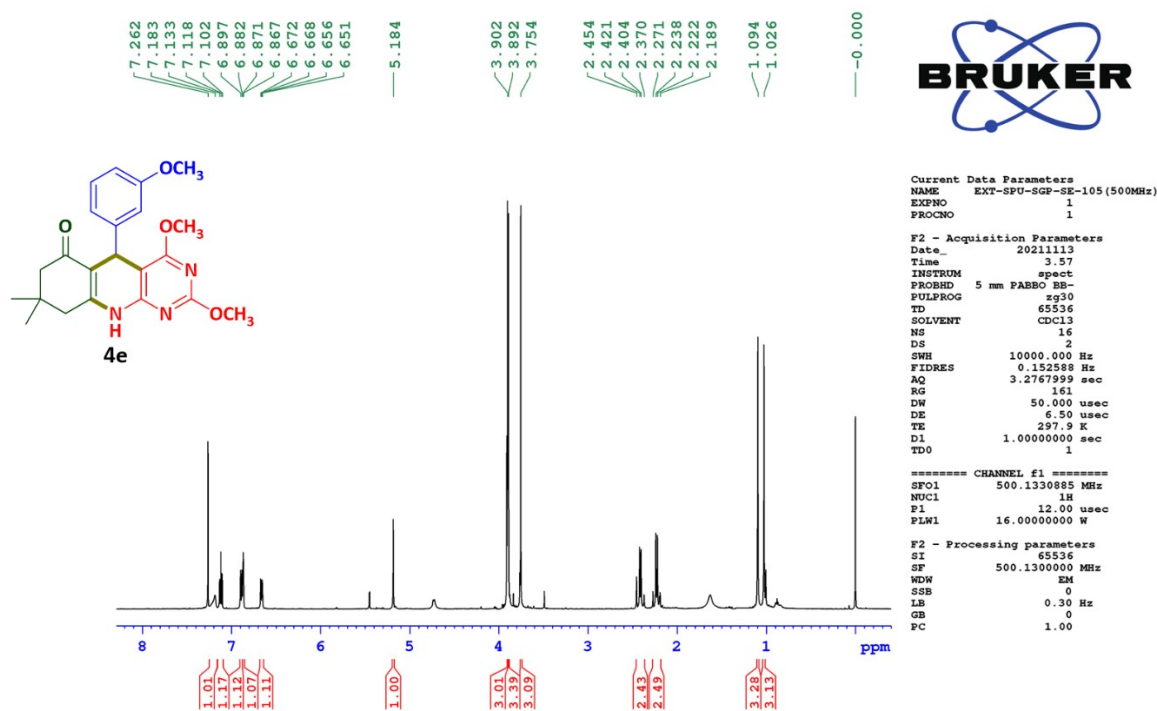

Figure S10:  $^{13}\text{C-NMR}$  (125 MHz,  $\text{CDCl}_3$ ) of Compound 4e.

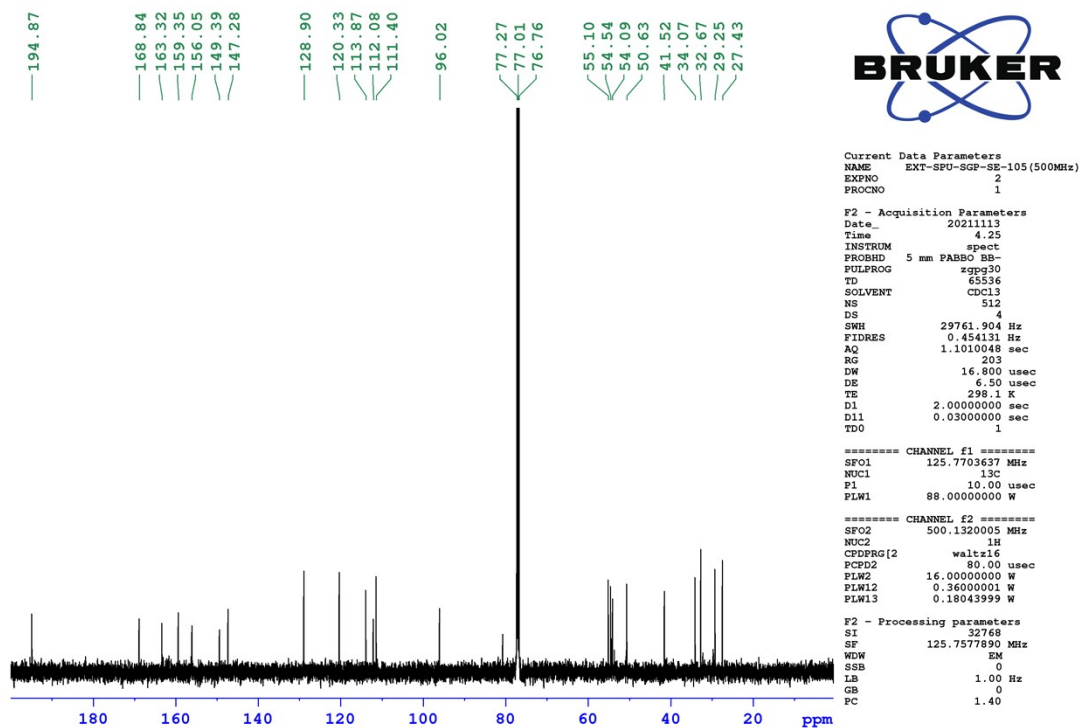

Figure S11:  $^1\text{H-NMR}$  (500 MHz,  $\text{CDCl}_3$ ) of Compound 4f.

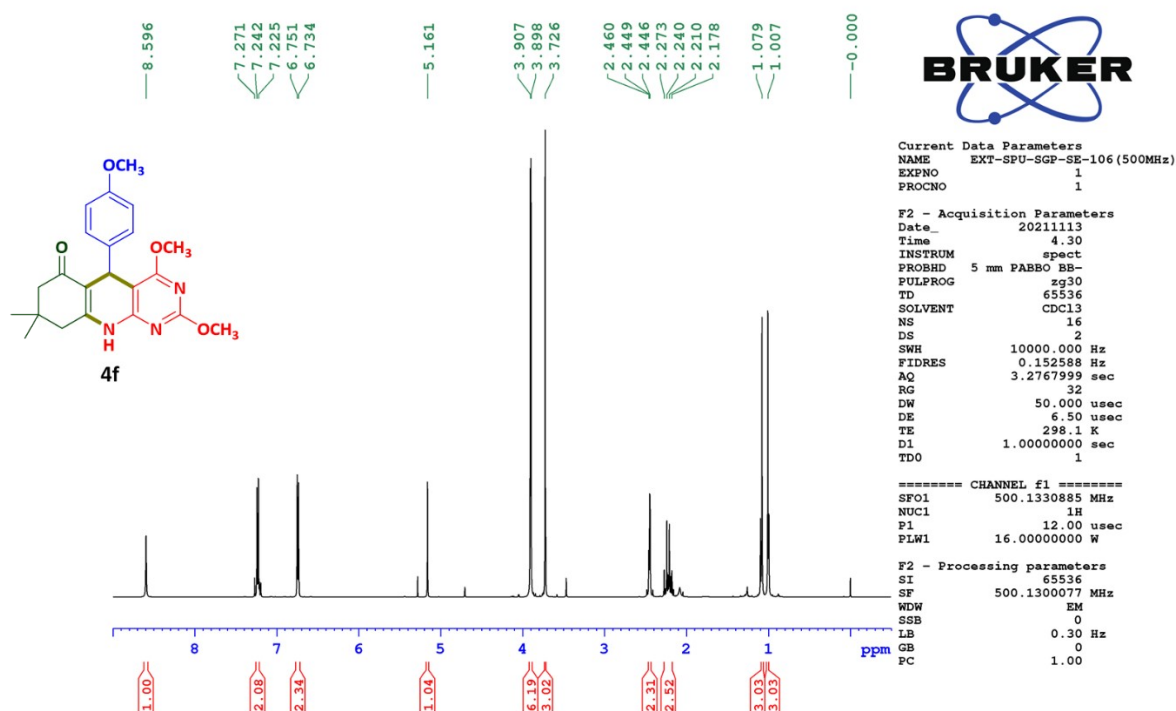

Figure S12:  $^{13}\text{C-NMR}$  (125 MHz,  $\text{CDCl}_3$ ) of Compound 4f.

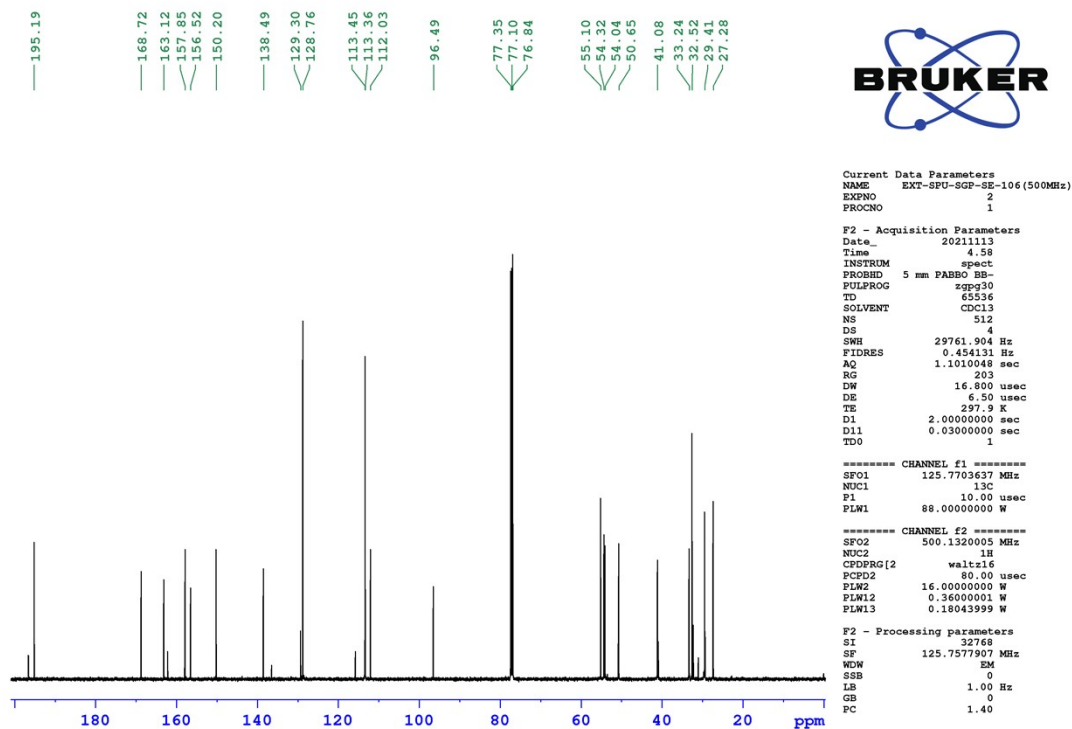

Figure S13:  $^1\text{H-NMR}$  (500 MHz,  $\text{CDCl}_3$ ) of Compound 4g.

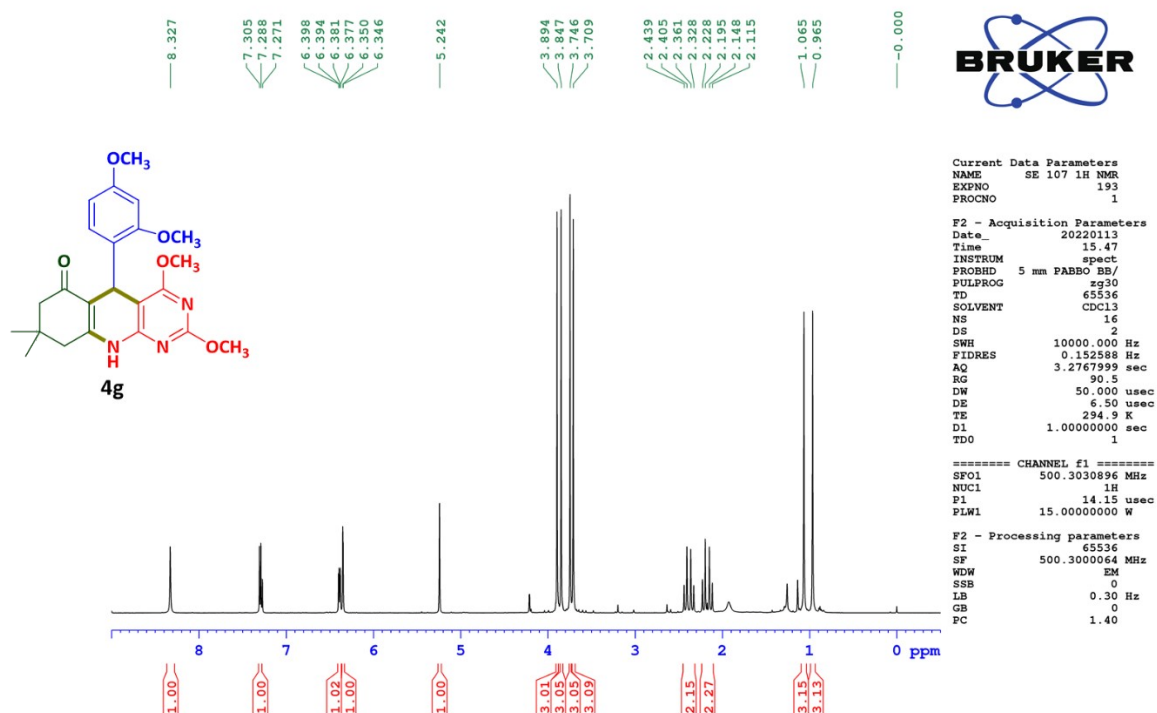

Figure S14:  $^{13}\text{C-NMR}$  (125 MHz,  $\text{CDCl}_3$ ) of Compound 4g.

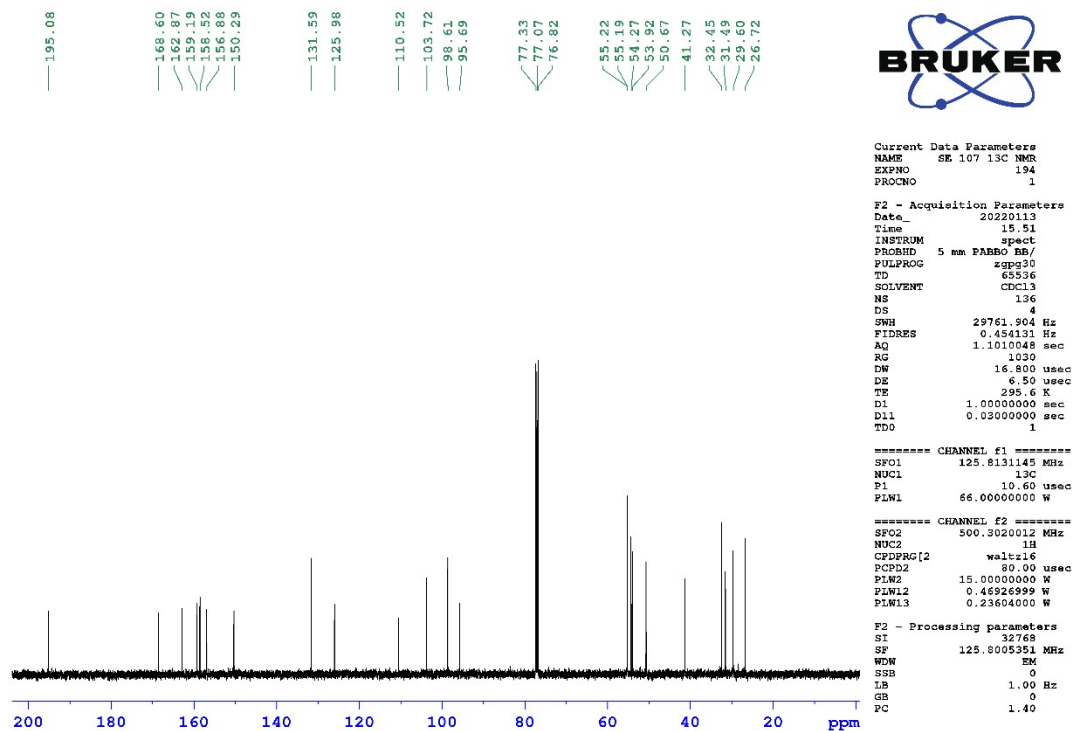



Figure S15:  $^1\text{H-NMR}$  (500 MHz,  $\text{CDCl}_3$ ) of Compound 4h.

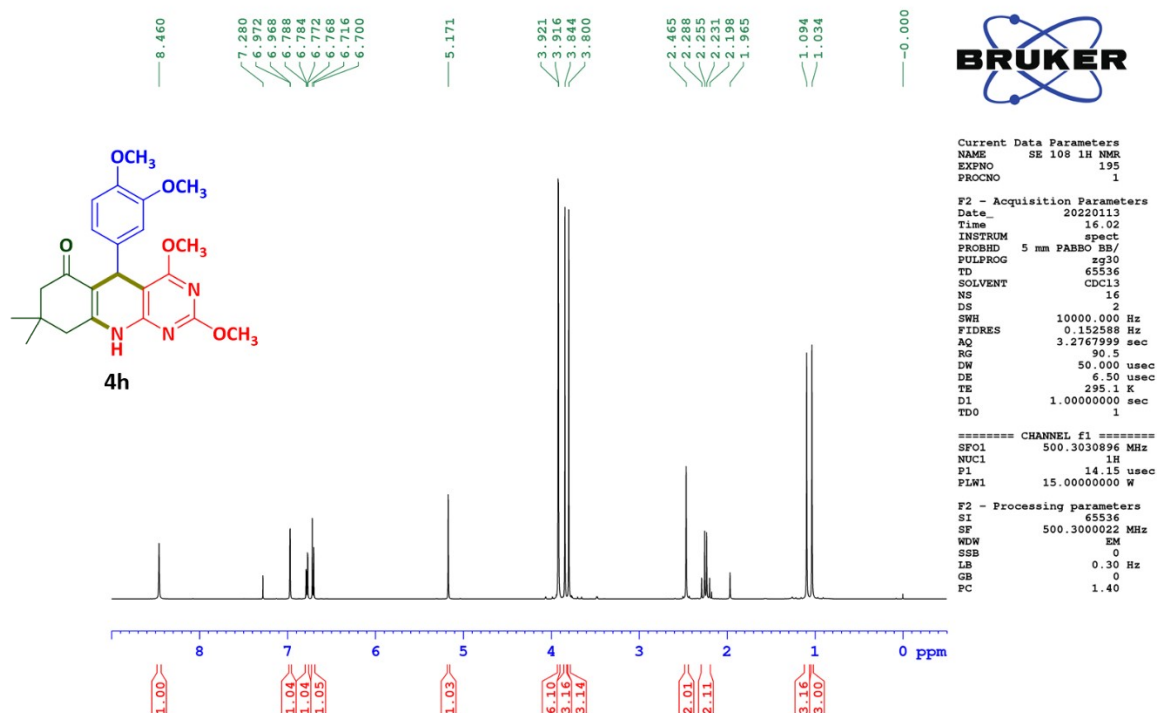

Figure S16:  $^{13}\text{C-NMR}$  (125 MHz,  $\text{CDCl}_3$ ) of Compound 4h.

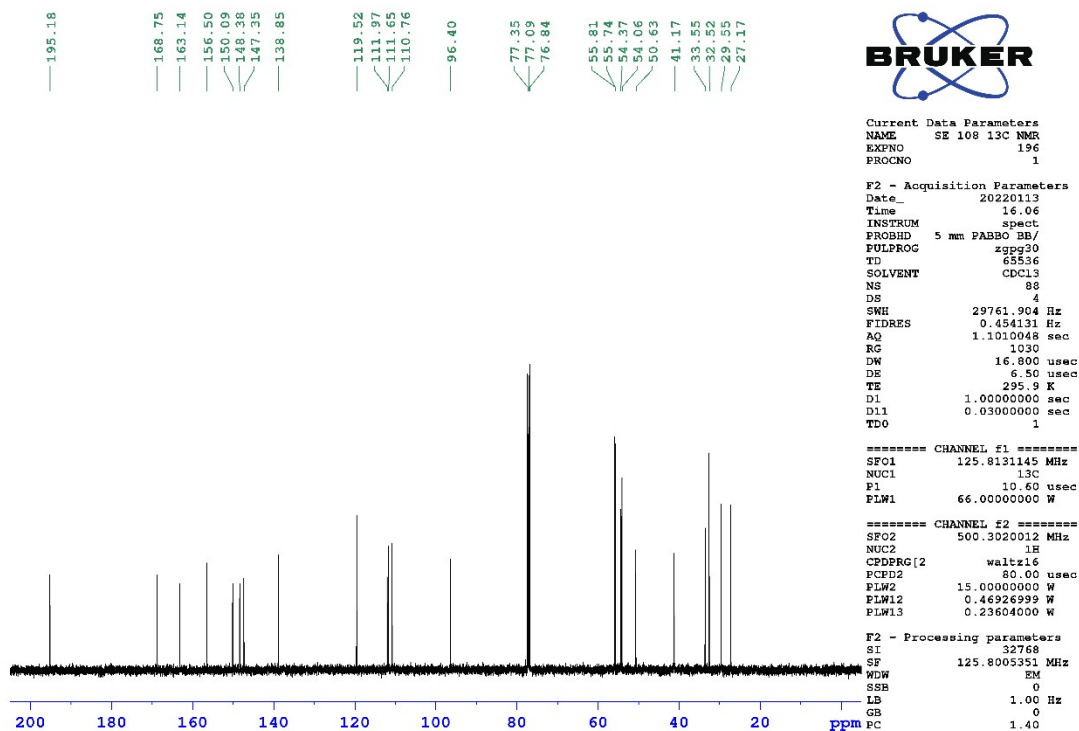

Figure S17: <sup>1</sup>H-NMR (500 MHz, CDCl<sub>3</sub>) of Compound 4i.

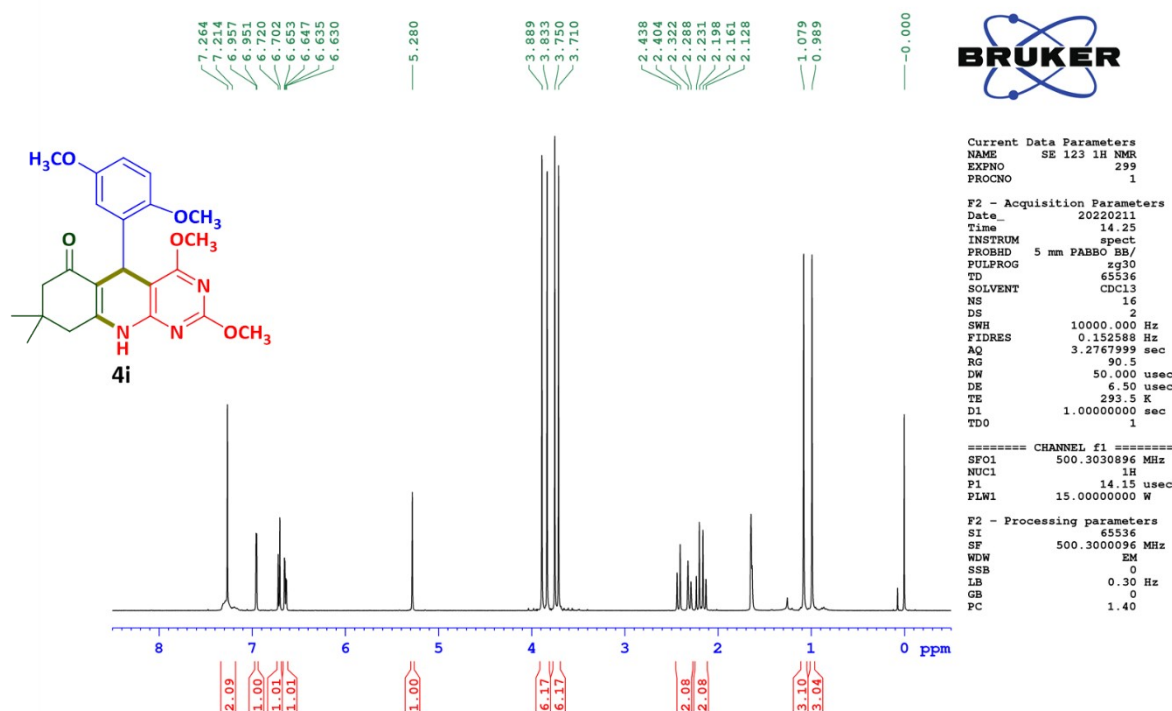

Figure S18: <sup>13</sup>C-NMR (125 MHz, CDCl<sub>3</sub>) of Compound 4i.

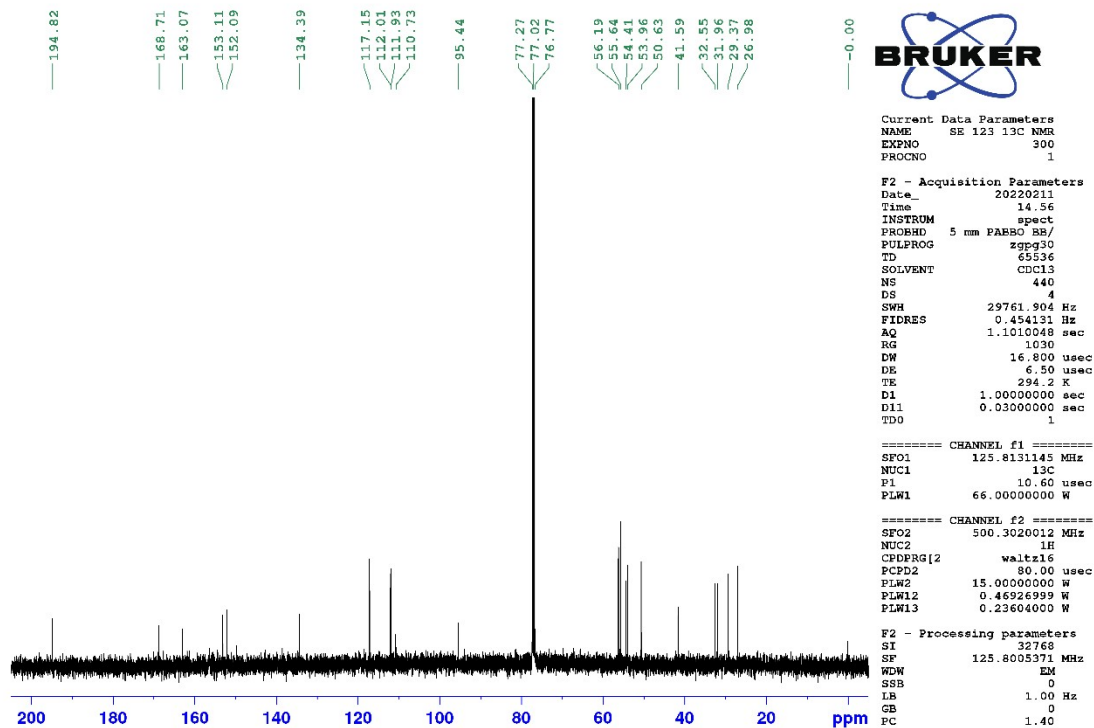

Figure S19:  $^1\text{H-NMR}$  (500 MHz,  $\text{CDCl}_3$ ) of Compound 4j.

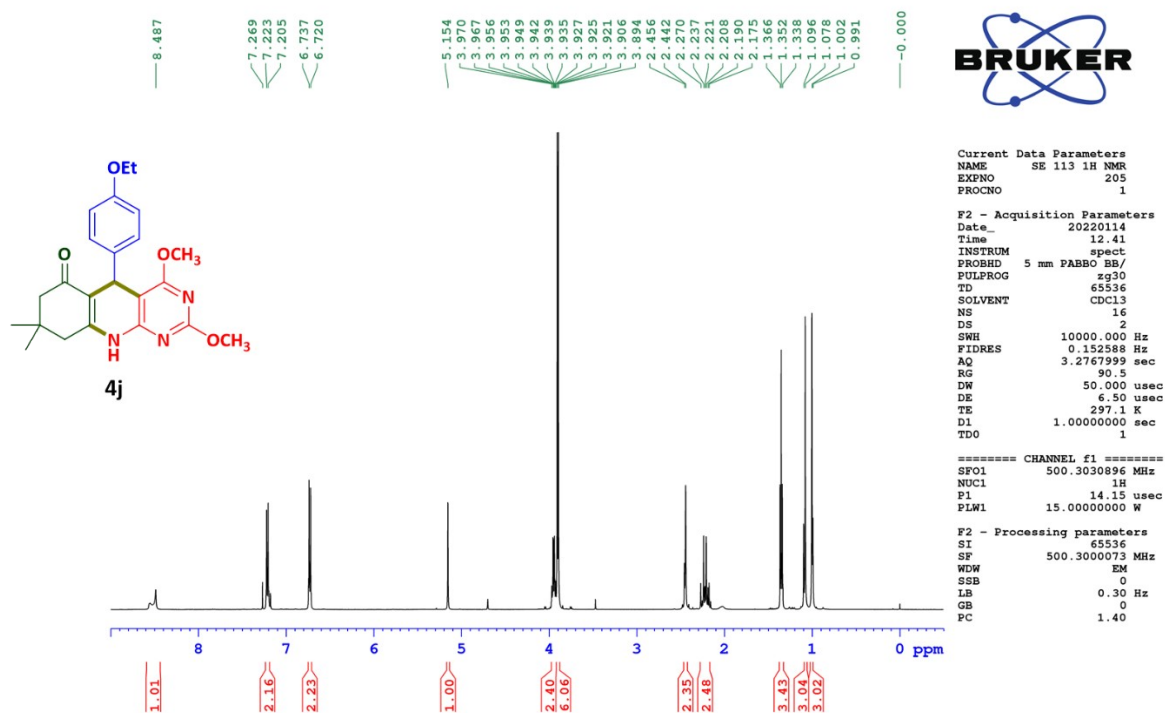

Figure S20:  $^{13}\text{C-NMR}$  (125 MHz,  $\text{CDCl}_3$ ) of Compound 4j.

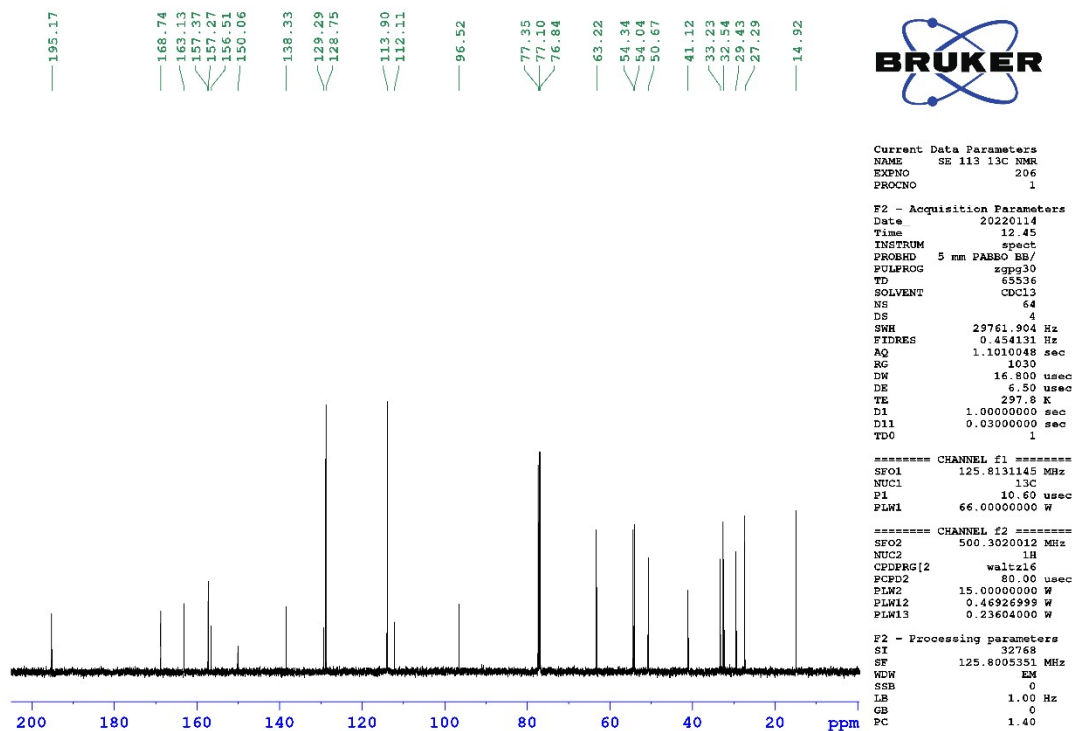

Figure S21: <sup>1</sup>H-NMR (500 MHz, CDCl<sub>3</sub> and DMSO-d<sub>6</sub>) of Compound 4k.

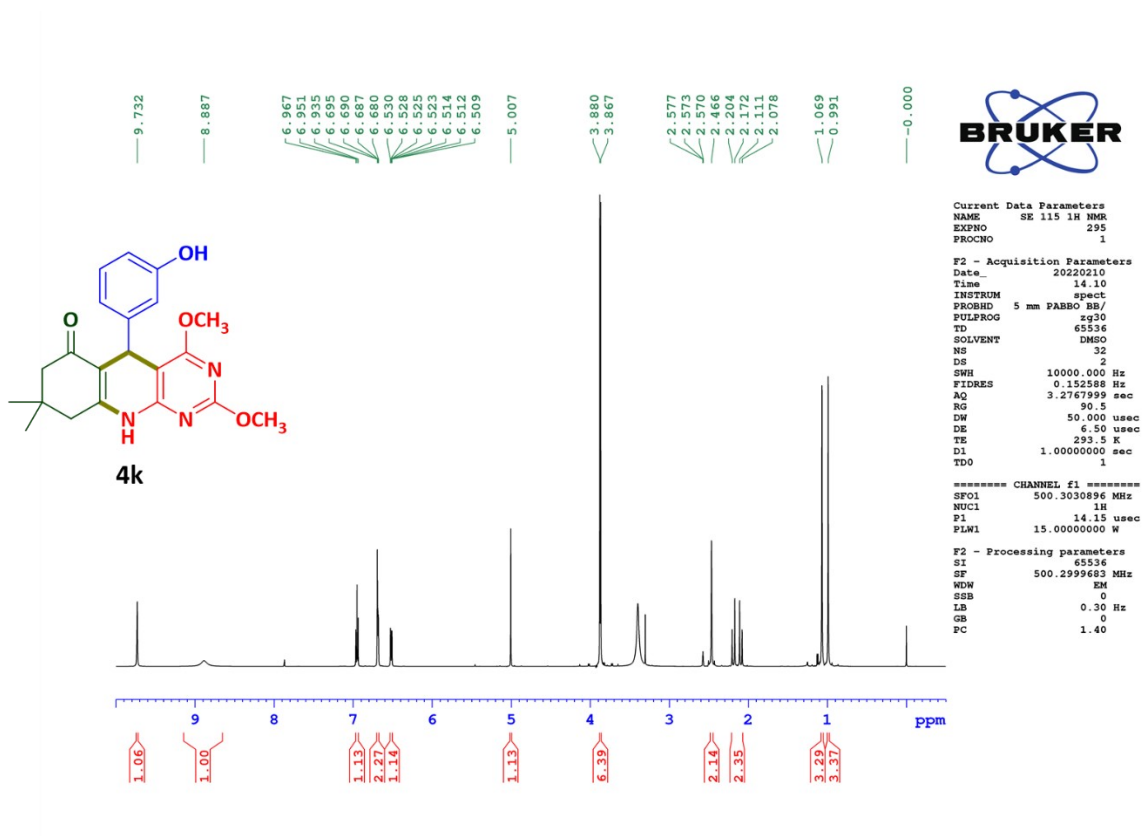

Figure S22: <sup>13</sup>C-NMR (125 MHz, CDCl<sub>3</sub> and DMSO-d<sub>6</sub>) of Compound 4k.

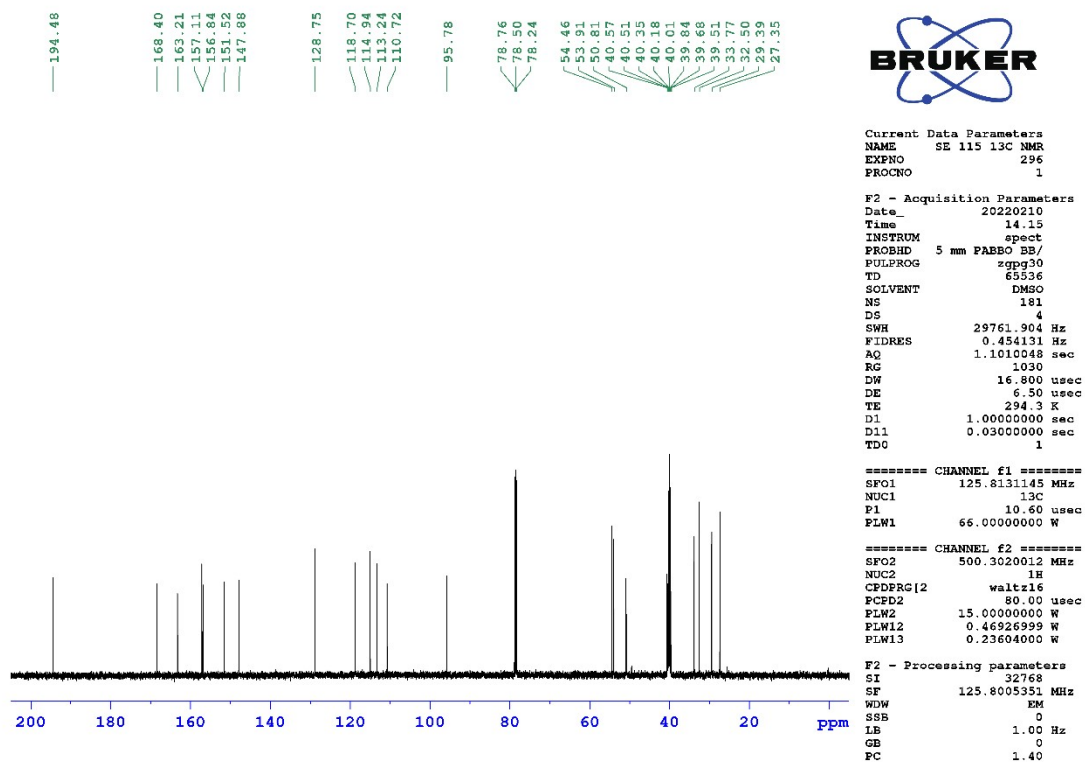

Figure S23: <sup>1</sup>H-NMR (500 MHz, CDCl<sub>3</sub>) of Compound 4I.

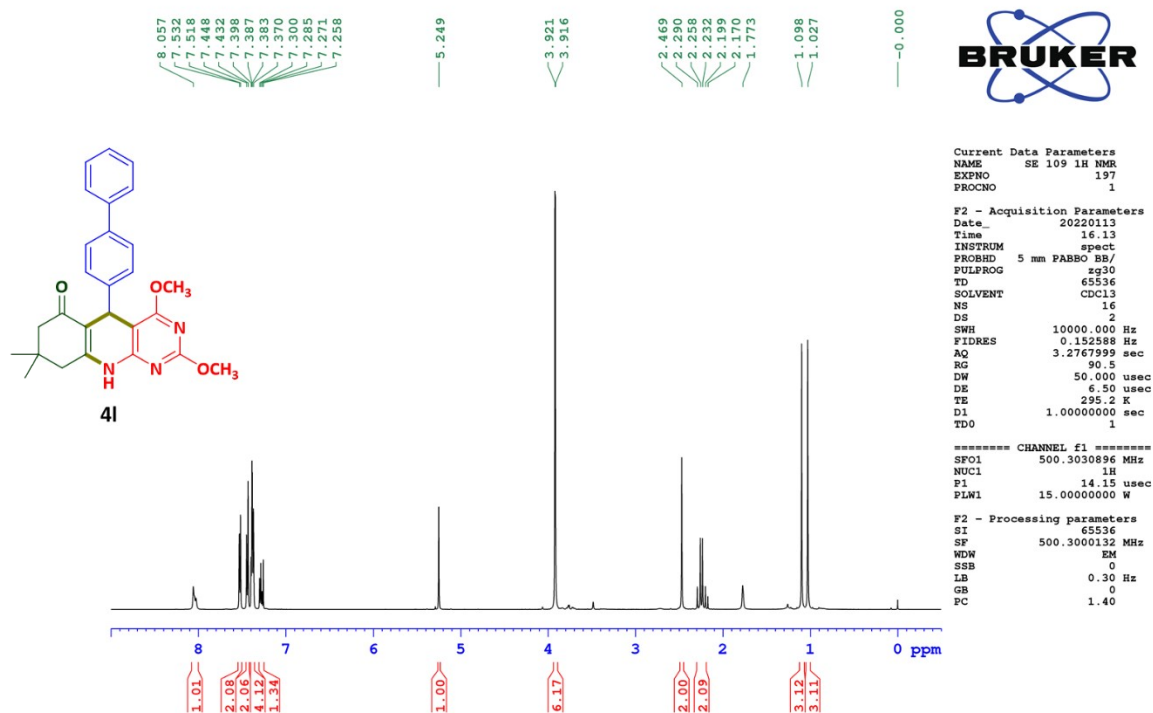

Figure S24: <sup>13</sup>C-NMR (125 MHz, CDCl<sub>3</sub>) of Compound 4I.

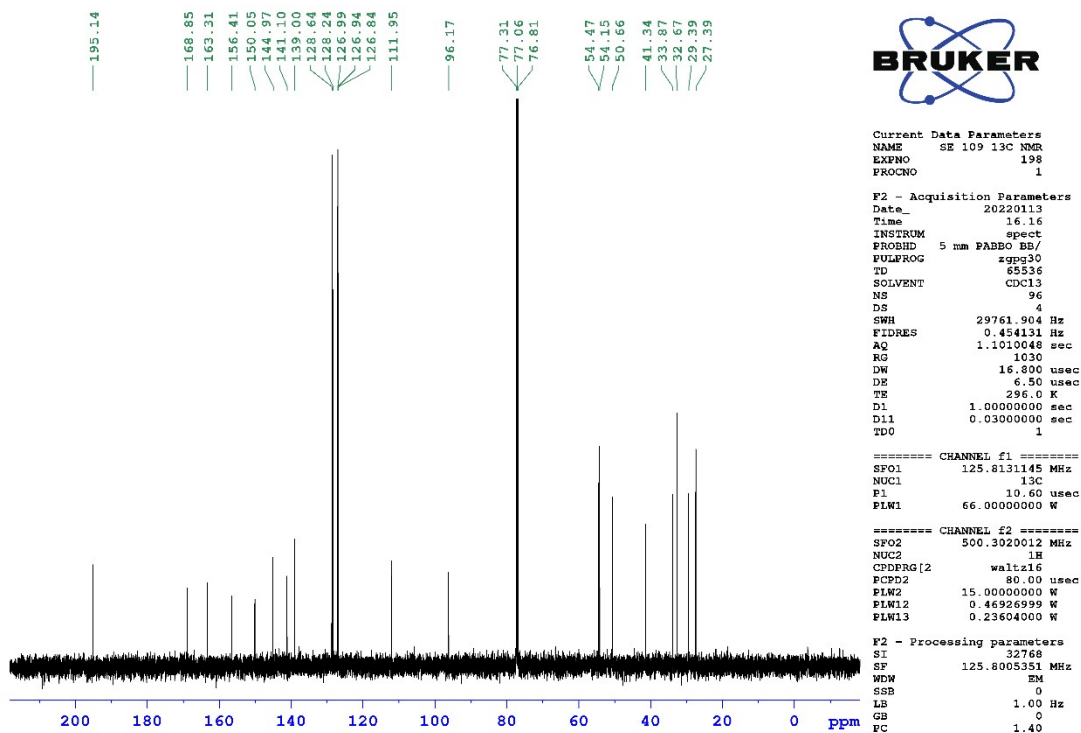

Figure S25: <sup>1</sup>H-NMR (500 MHz, CDCl<sub>3</sub>) of Compound 4m.

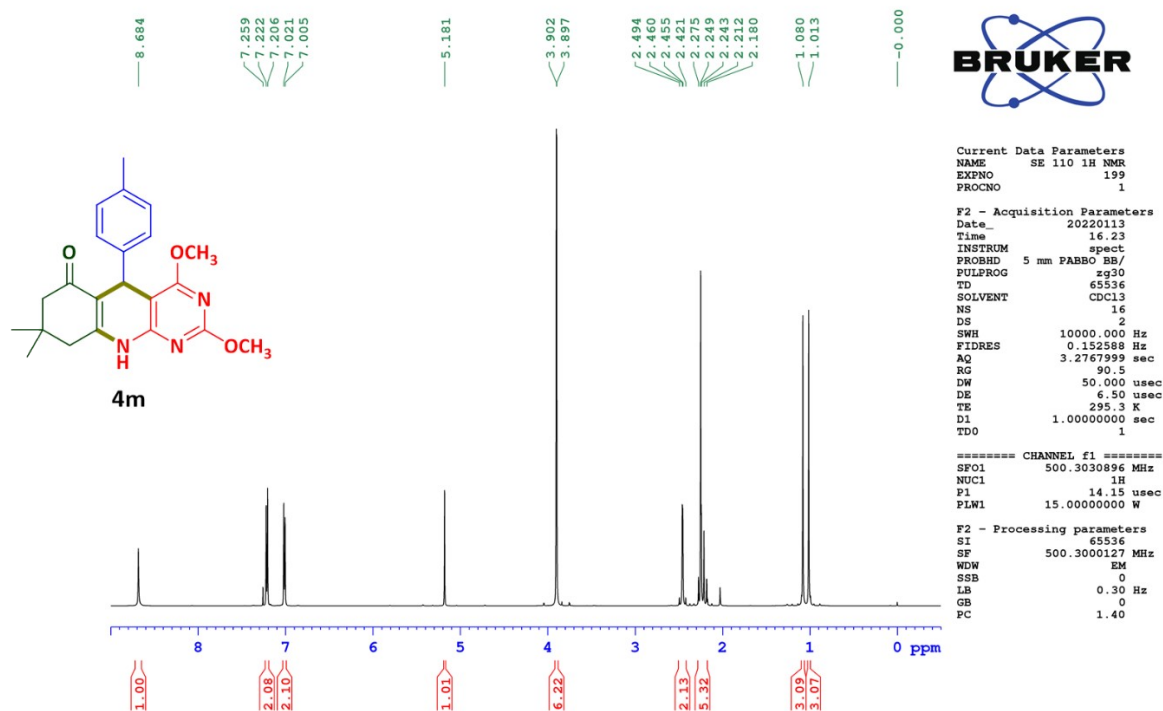

Figure S26: <sup>13</sup>C-NMR (125 MHz, CDCl<sub>3</sub>) of Compound 4m.

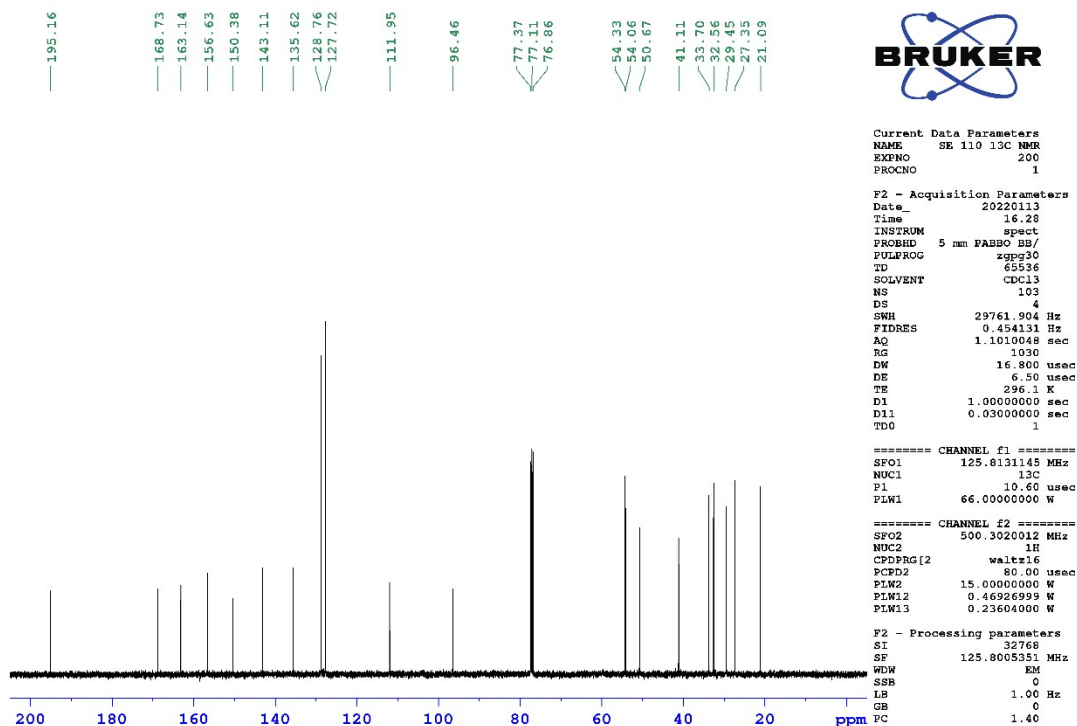

Figure S27:  $^1\text{H-NMR}$  (500 MHz,  $\text{CDCl}_3$ ) of Compound **4n**.

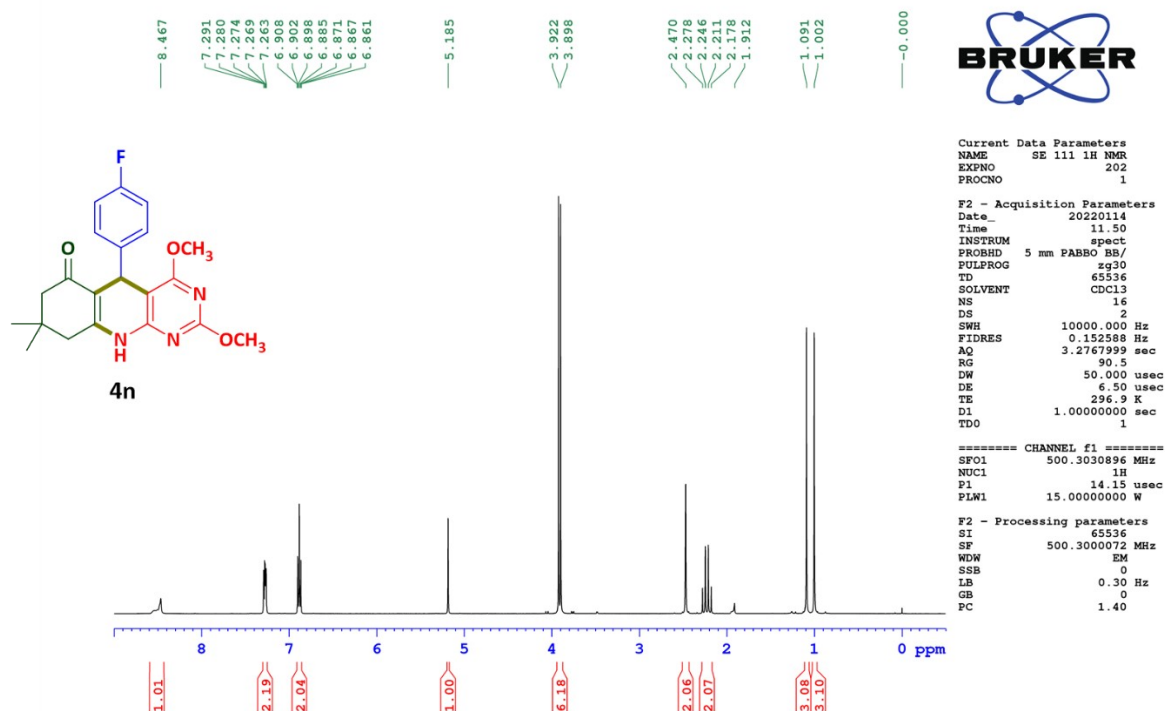

Figure S28:  $^{13}\text{C-NMR}$  (125 MHz,  $\text{CDCl}_3$ ) of Compound **4n**.

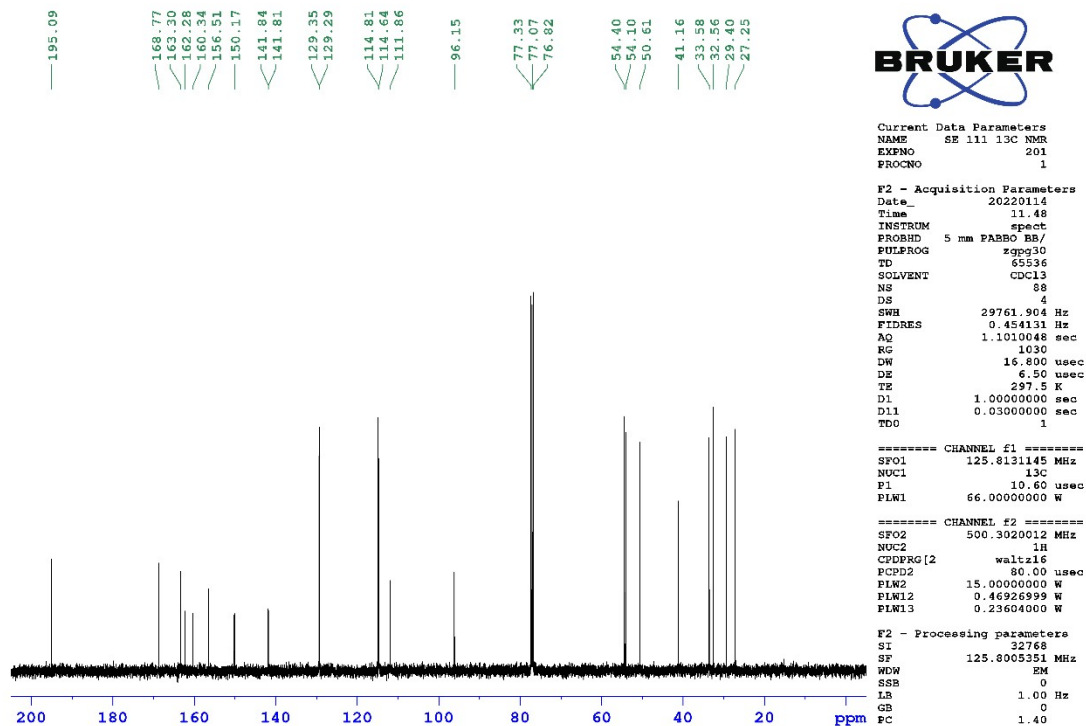

Figure S29:  $^1\text{H-NMR}$  (500 MHz,  $\text{CDCl}_3$ ) of Compound 4o.

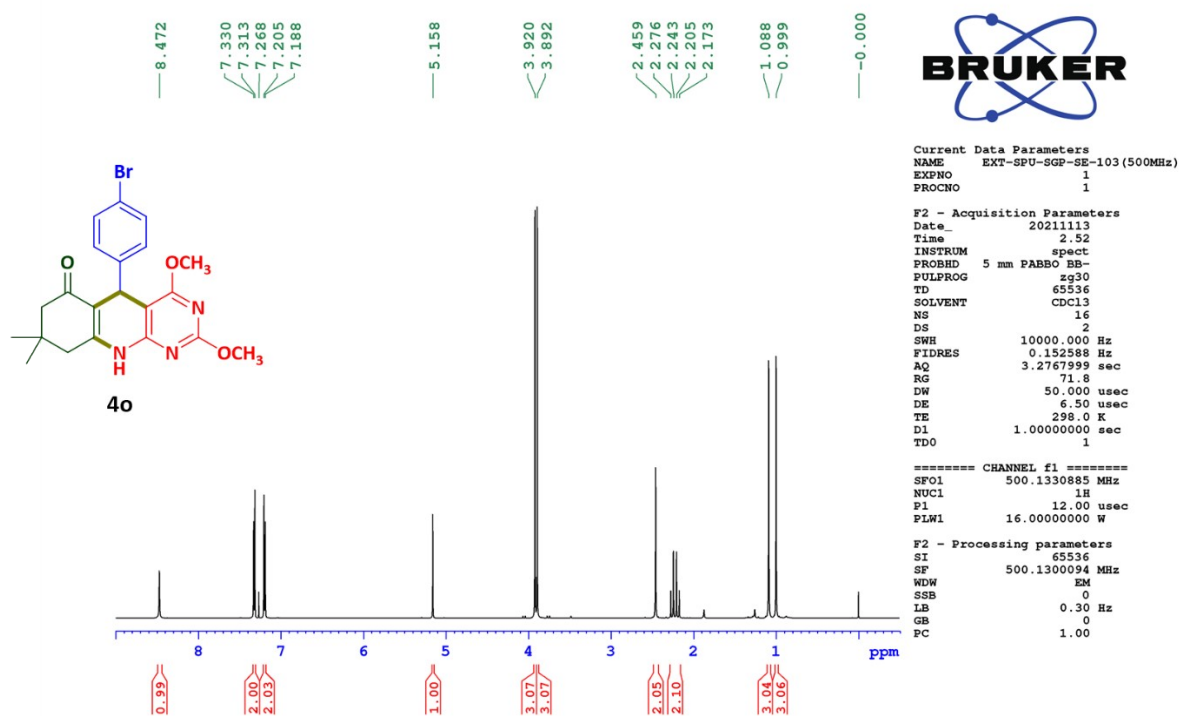

Figure S30:  $^{13}\text{C-NMR}$  (125 MHz,  $\text{CDCl}_3$ ) of Compound 4o.

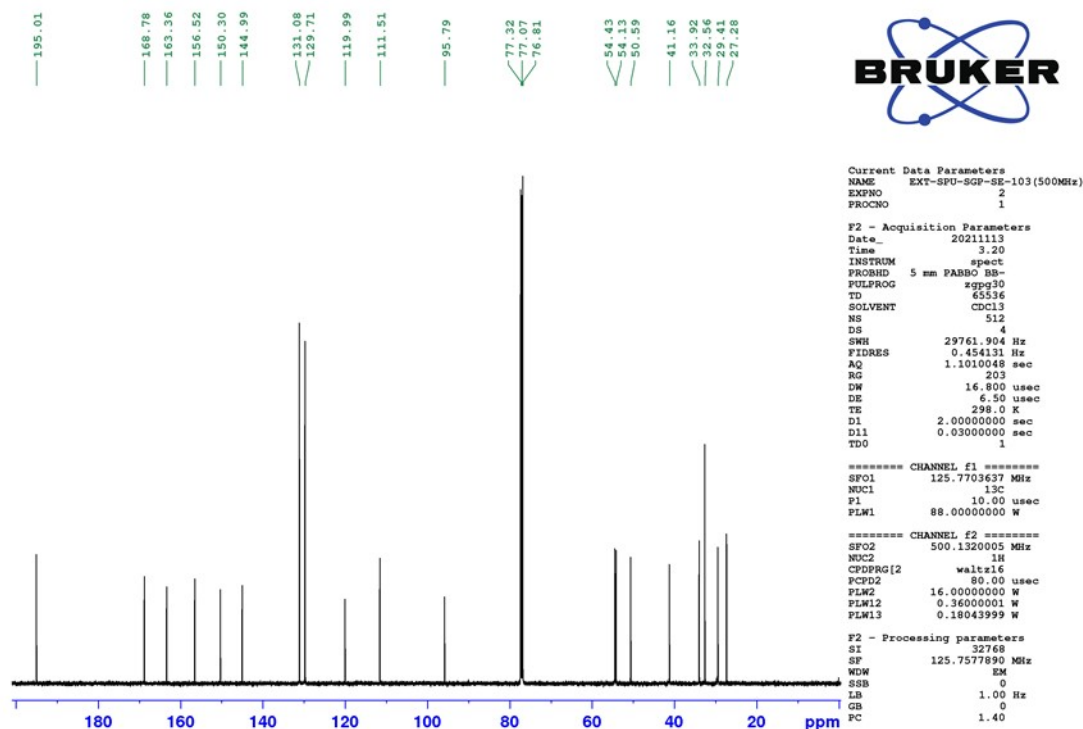



Figure S31:  $^1\text{H-NMR}$  (500 MHz,  $\text{CDCl}_3$ ) of Compound 4p.

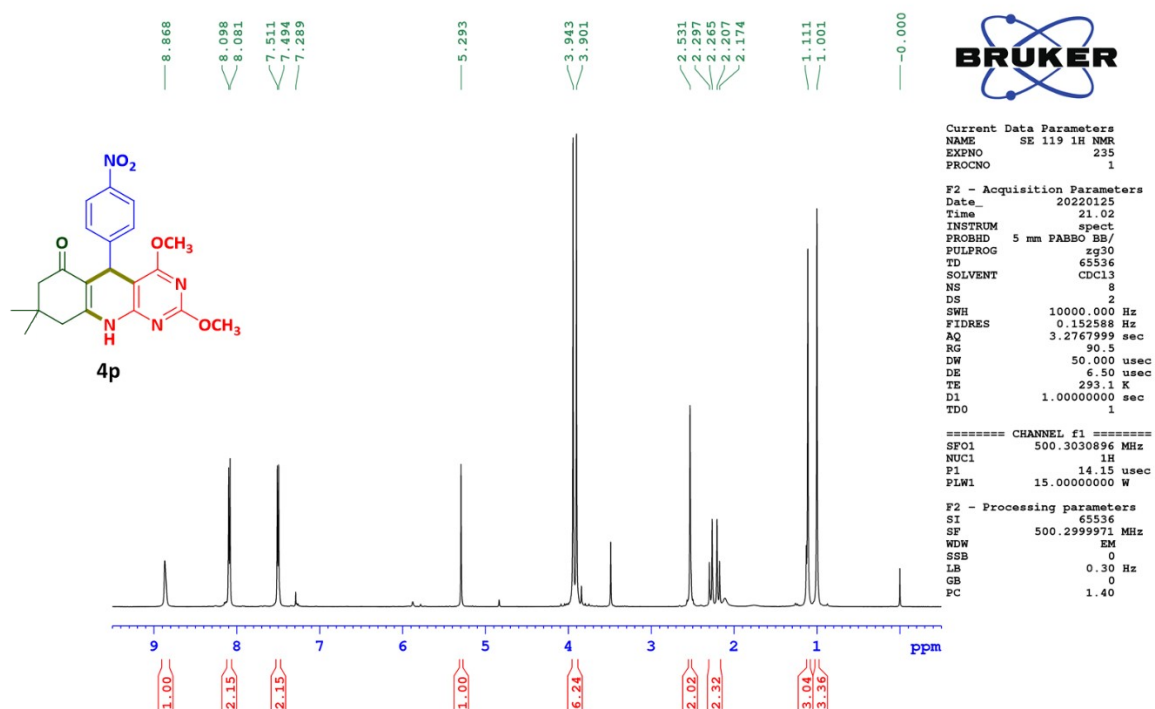

Figure S32:  $^{13}\text{C-NMR}$  (125 MHz,  $\text{CDCl}_3$ ) of Compound 4p.

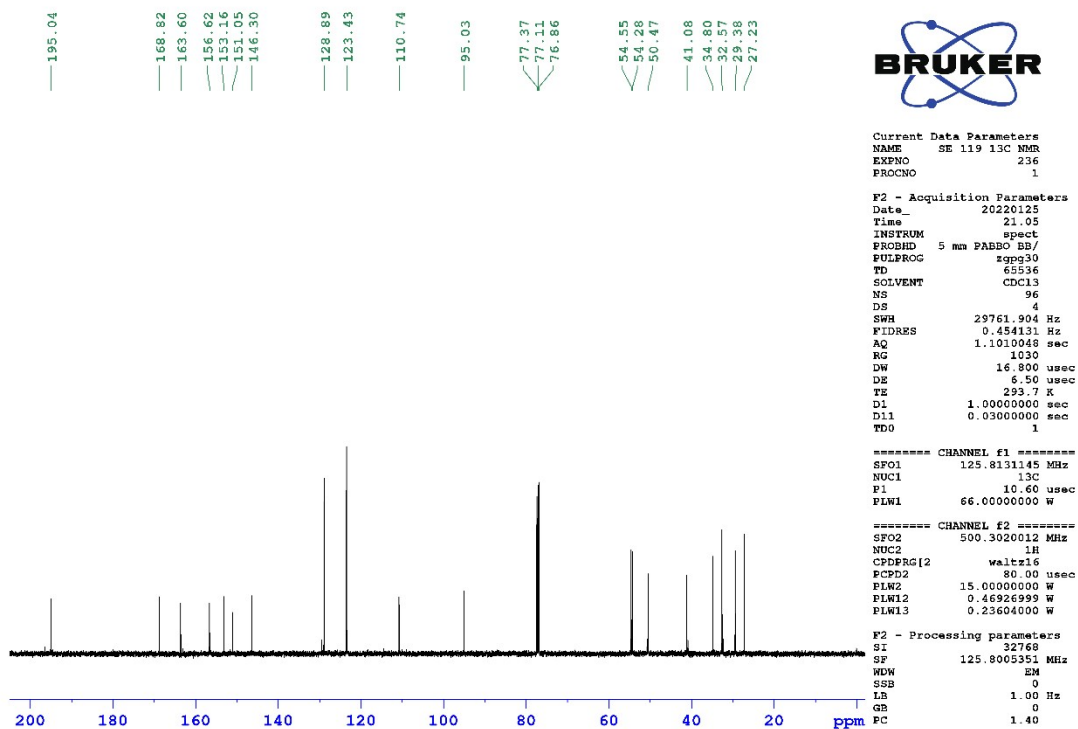

Figure S33:  $^1\text{H-NMR}$  (500 MHz,  $\text{CDCl}_3$ ) of Compound **4q**.

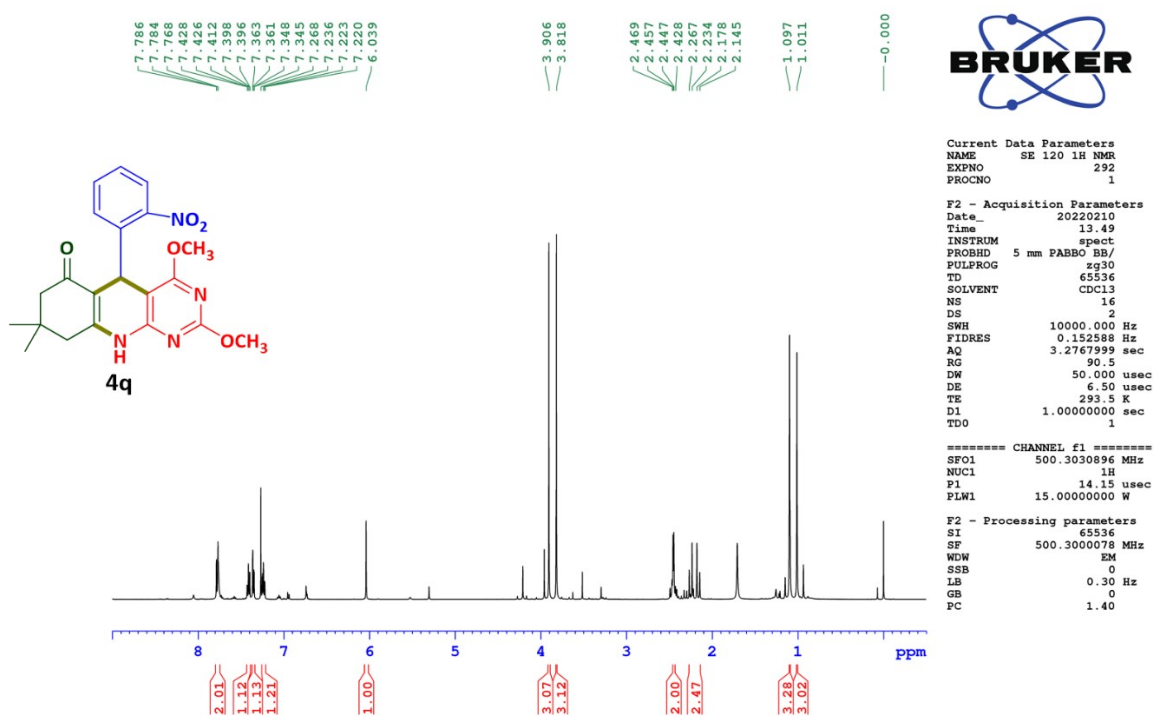

Figure S34:  $^{13}\text{C-NMR}$  (125 MHz,  $\text{CDCl}_3$ ) of Compound **4q**.

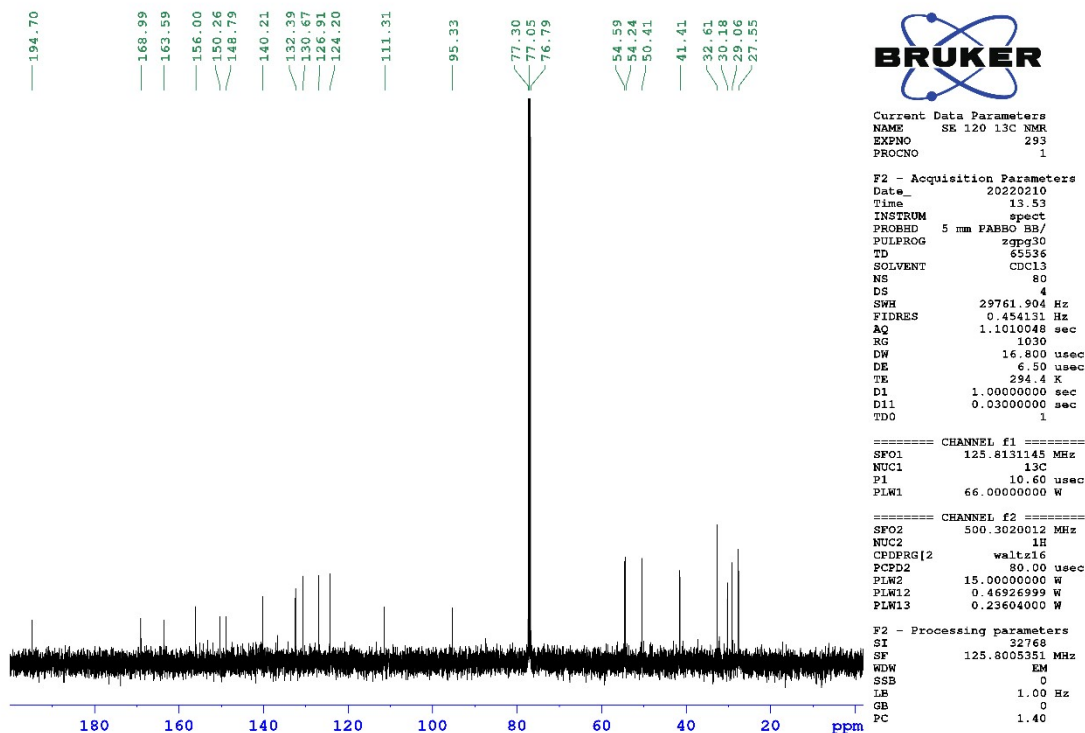

Figure S35: <sup>1</sup>H-NMR (500 MHz, CDCl<sub>3</sub>) of Compound 4r.

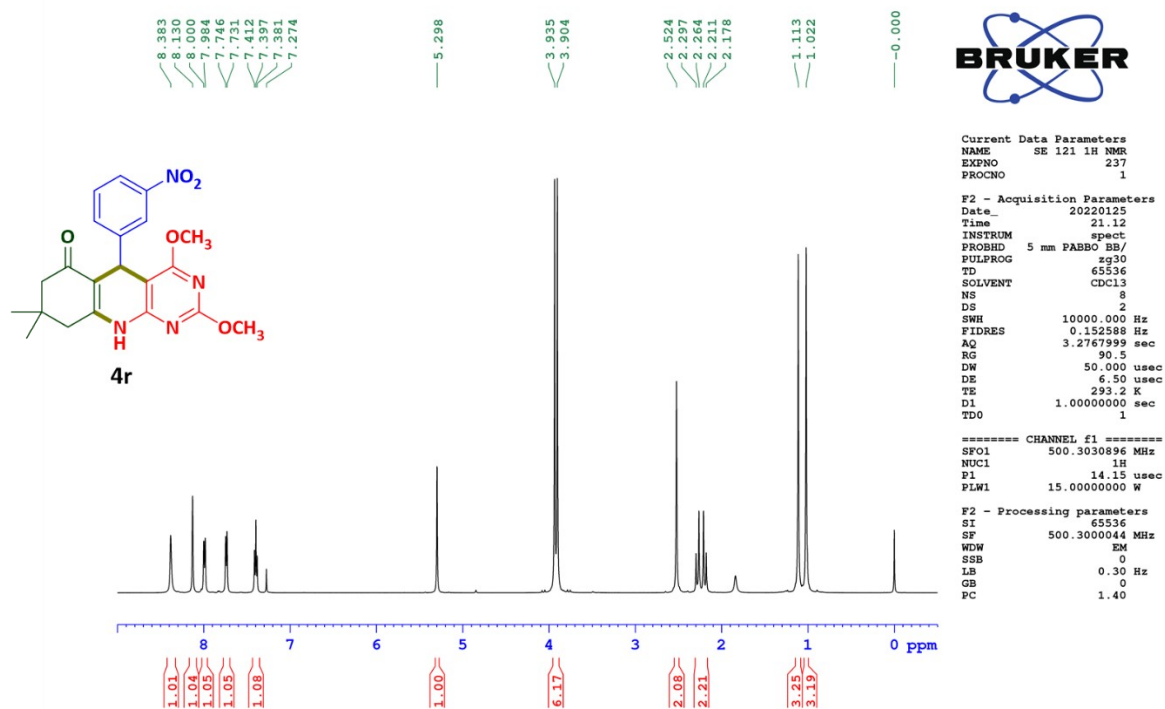

Figure S36: <sup>13</sup>C-NMR (125 MHz, CDCl<sub>3</sub>) of Compound 4r.

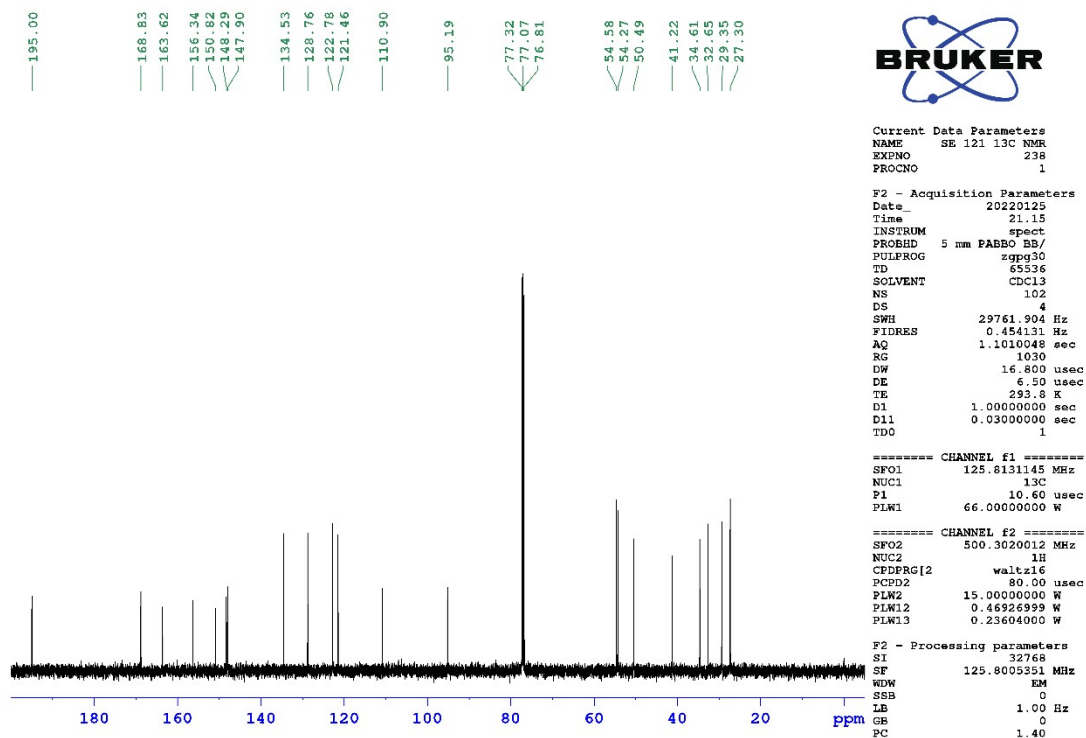

Figure S37:  $^1\text{H-NMR}$  (500 MHz,  $\text{CDCl}_3$ ) of Compound 4s.

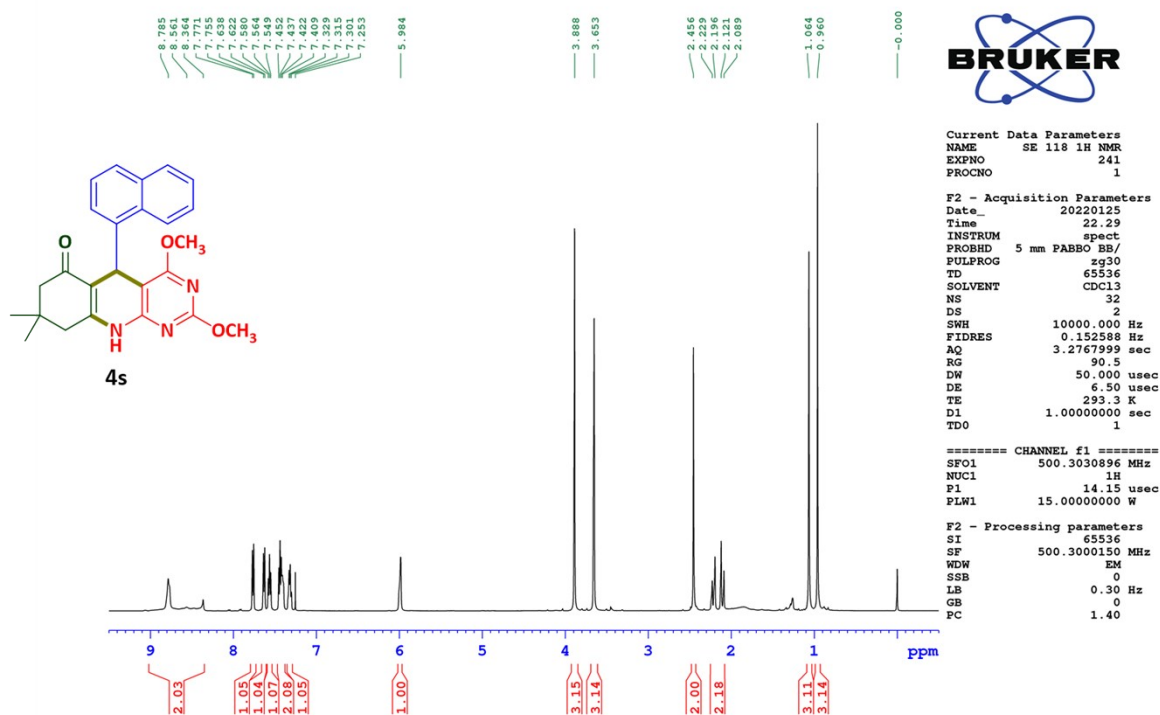

Figure S38:  $^{13}\text{C-NMR}$  (125 MHz,  $\text{CDCl}_3$ ) of Compound 4s.

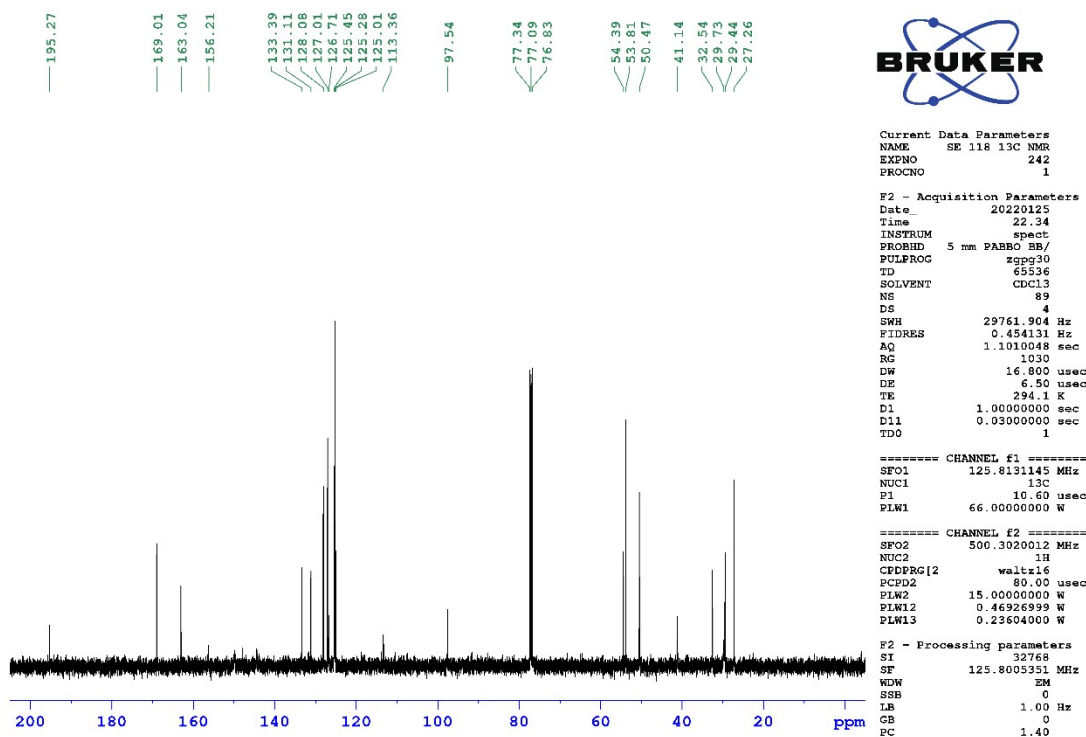

Figure S39: <sup>1</sup>H-NMR (500 MHz, CDCl<sub>3</sub>) of Compound 4t.

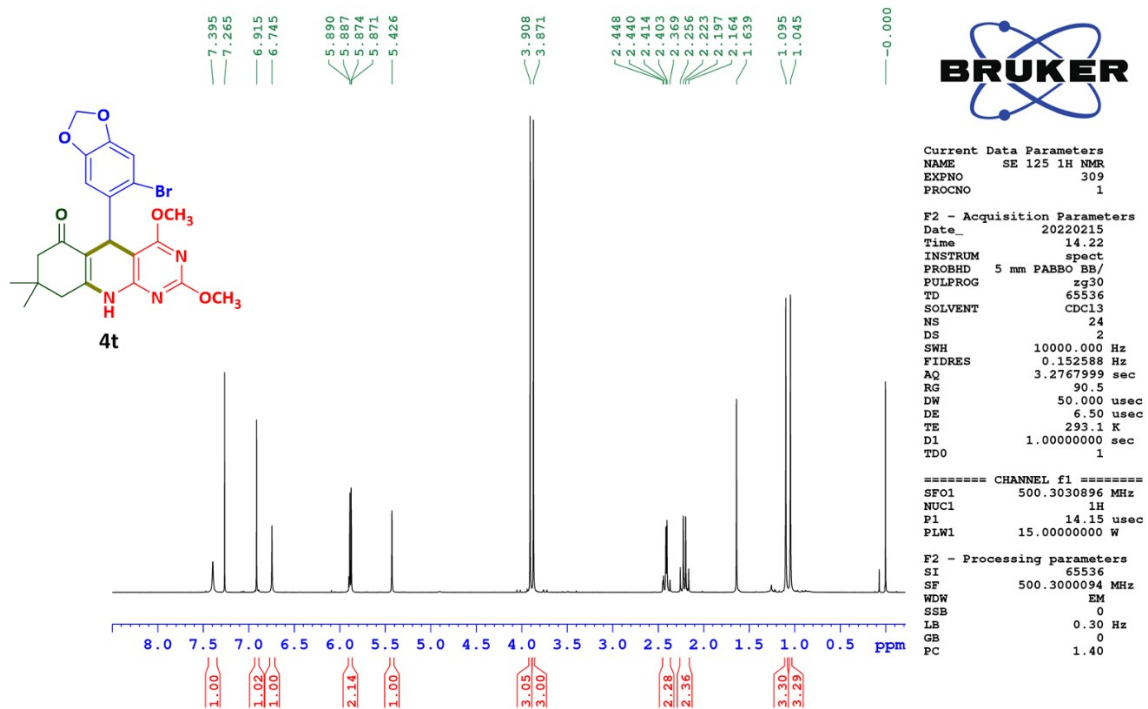

Figure S40: <sup>13</sup>C-NMR (125 MHz, CDCl<sub>3</sub>) of Compound 4t.

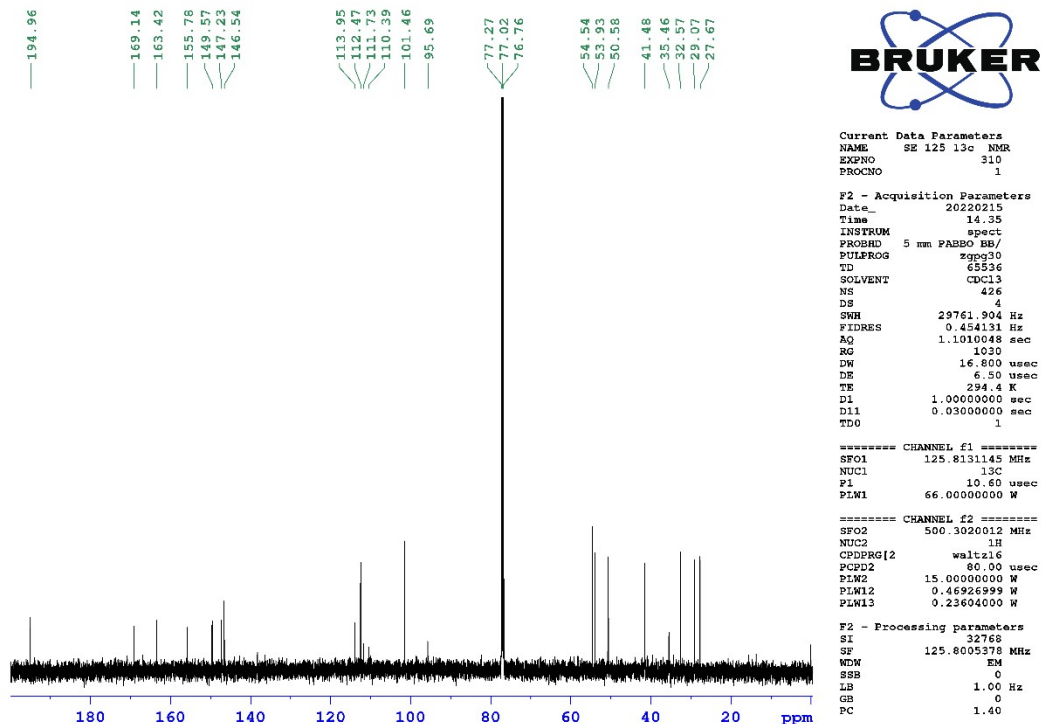

Figure S41:  $^1\text{H-NMR}$  (500 MHz,  $\text{CDCl}_3$ ) of Compound **4u**.

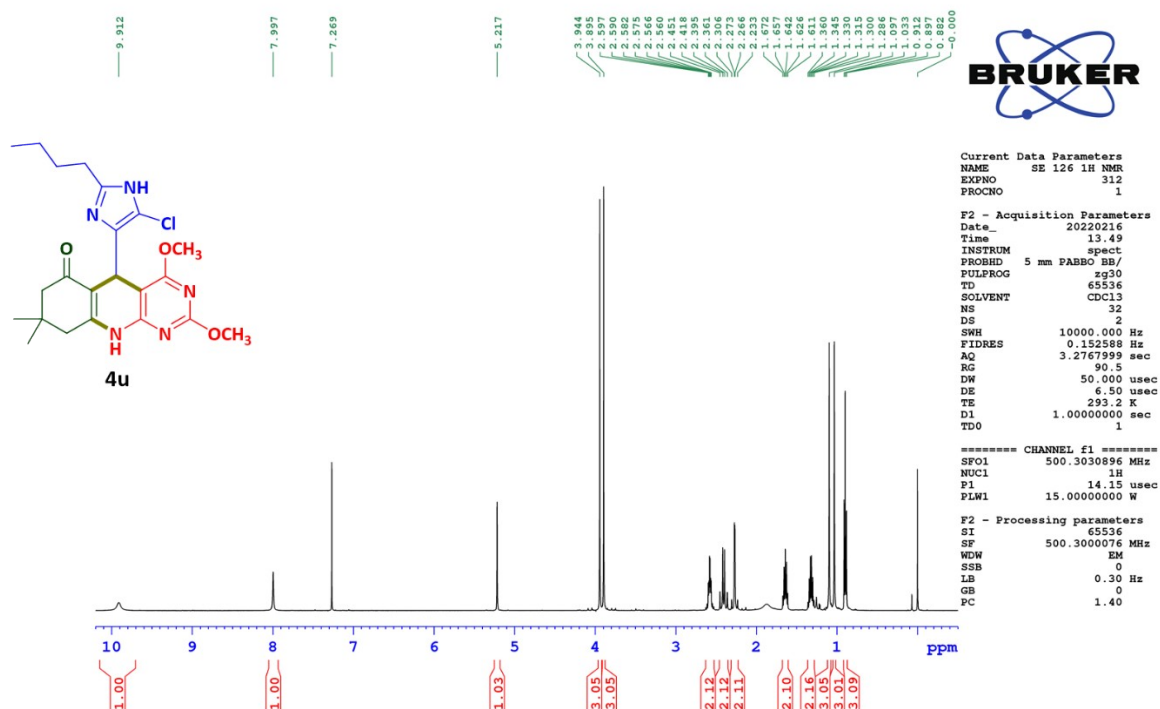

Figure S42:  $^{13}\text{C-NMR}$  (125 MHz,  $\text{CDCl}_3$ ) of Compound **4u**.

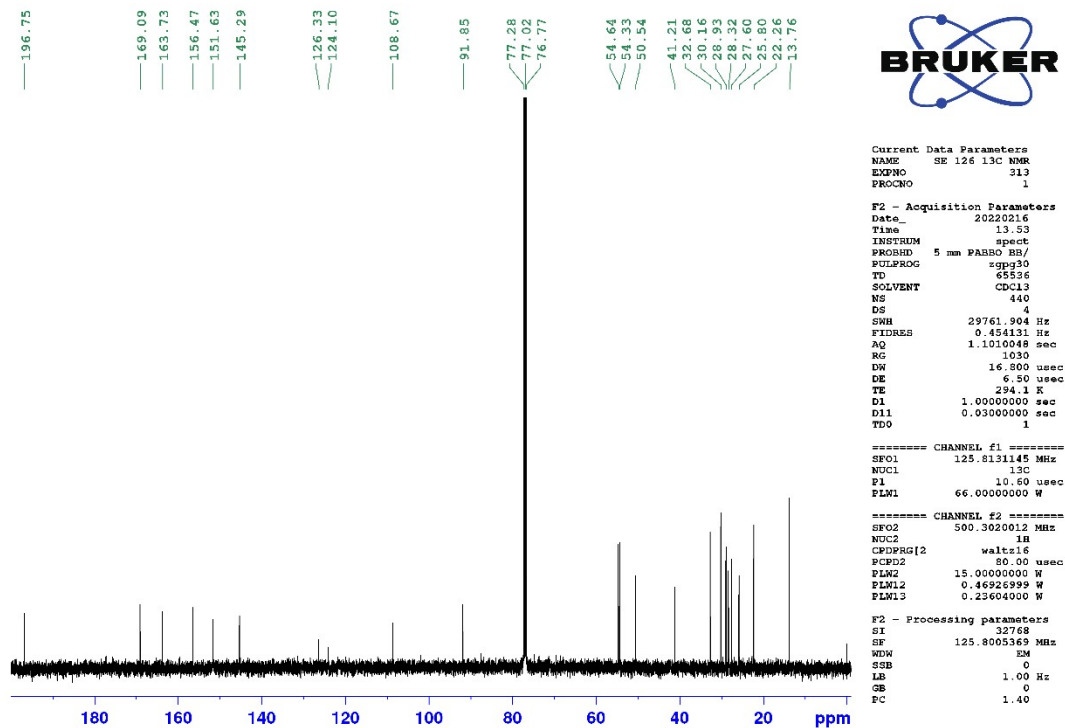

Figure S43:  $^1\text{H-NMR}$  (500 MHz,  $\text{CDCl}_3$ ) of Compound 4v.

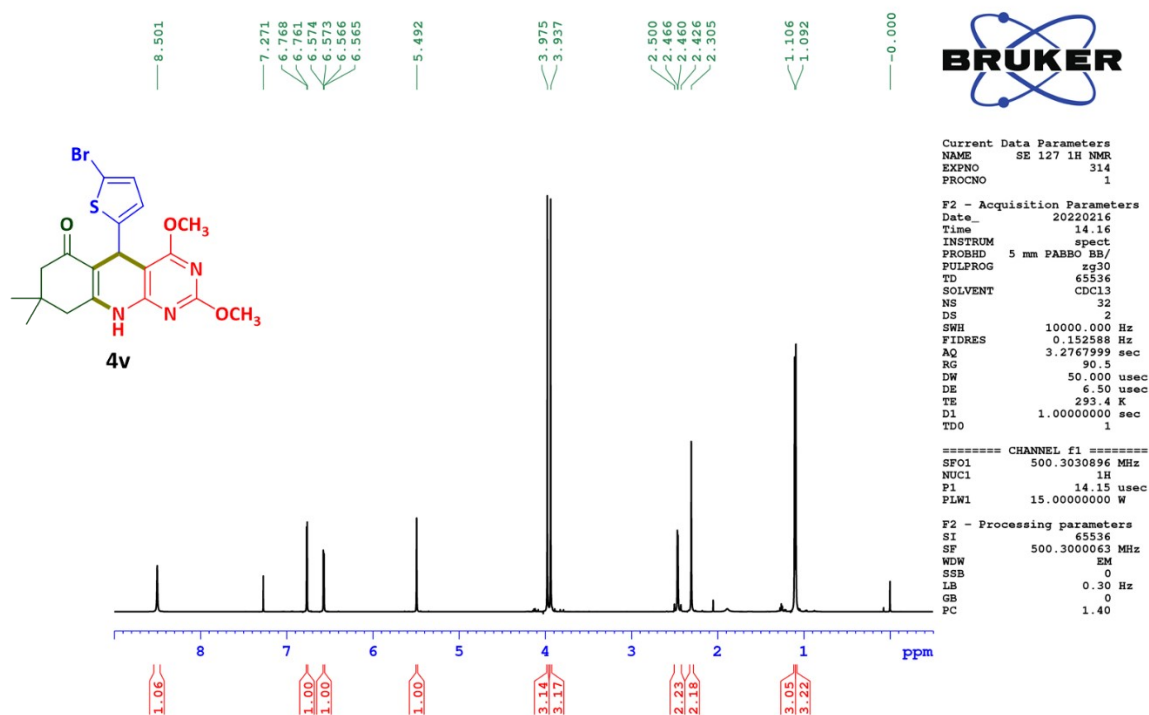

Figure S44:  $^{13}\text{C-NMR}$  (125 MHz,  $\text{CDCl}_3$ ) of Compound 4v.

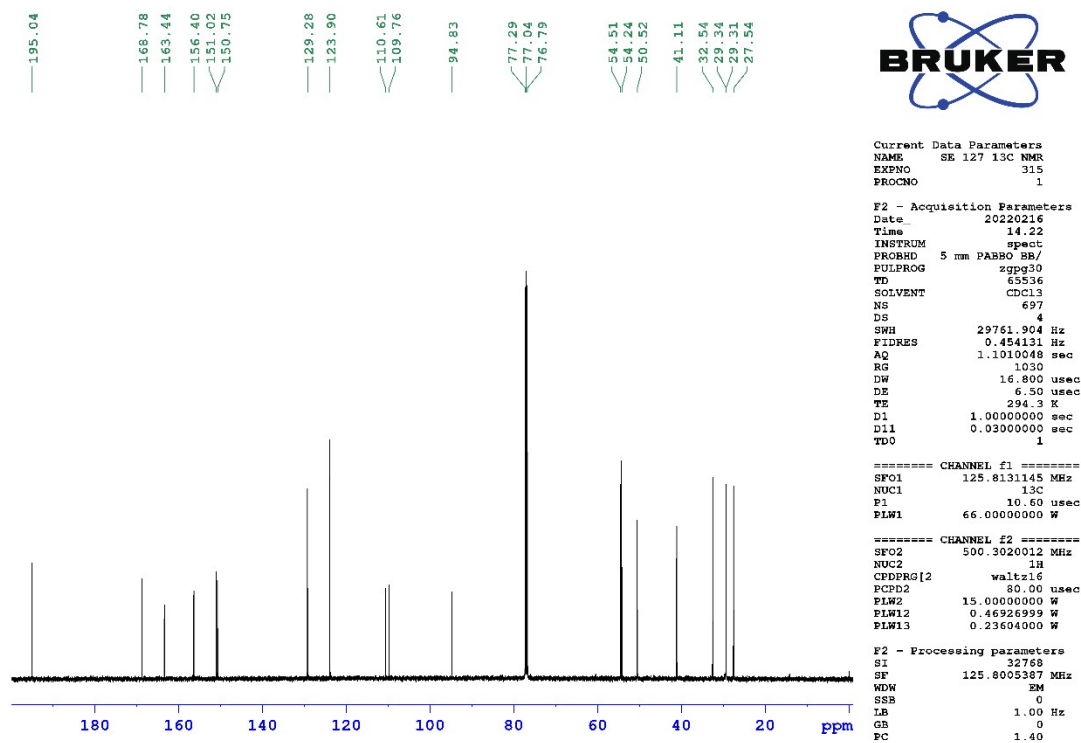

Figure S45: HRMS of Compound 4a.

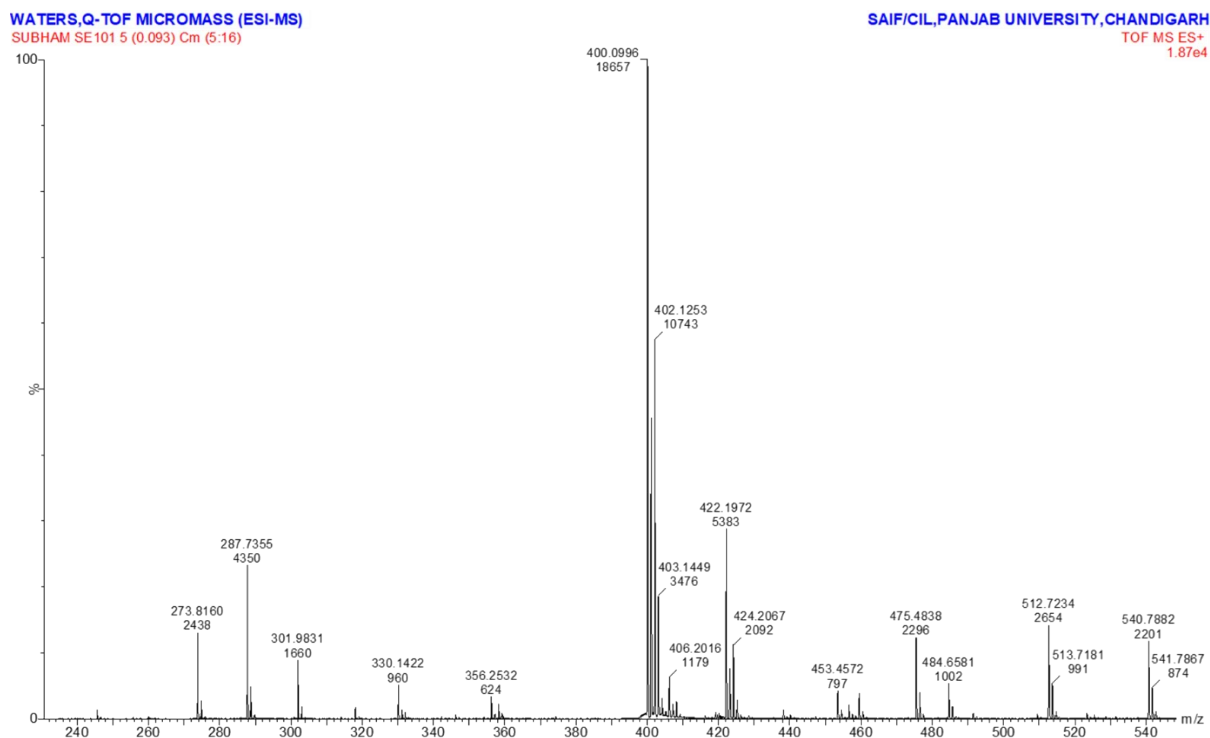

Figure S46: LCMS of Compound 4b.

| Retention Time (MS) | MS Area | Mol. Weight or Ion   |
|---------------------|---------|----------------------|
| 5.244               | 550930  | 365.20 I<br>364.20 I |

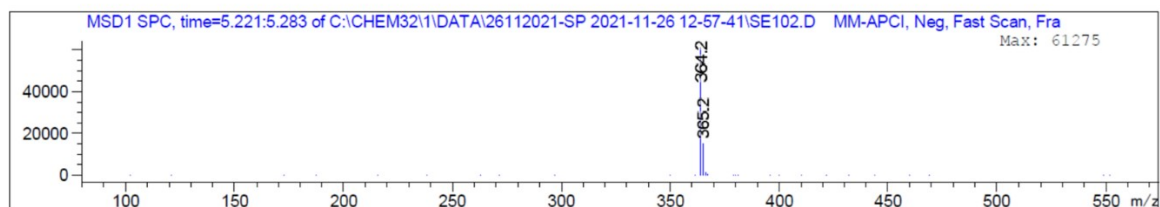



Figure S47: HRMS of Compound 4c.

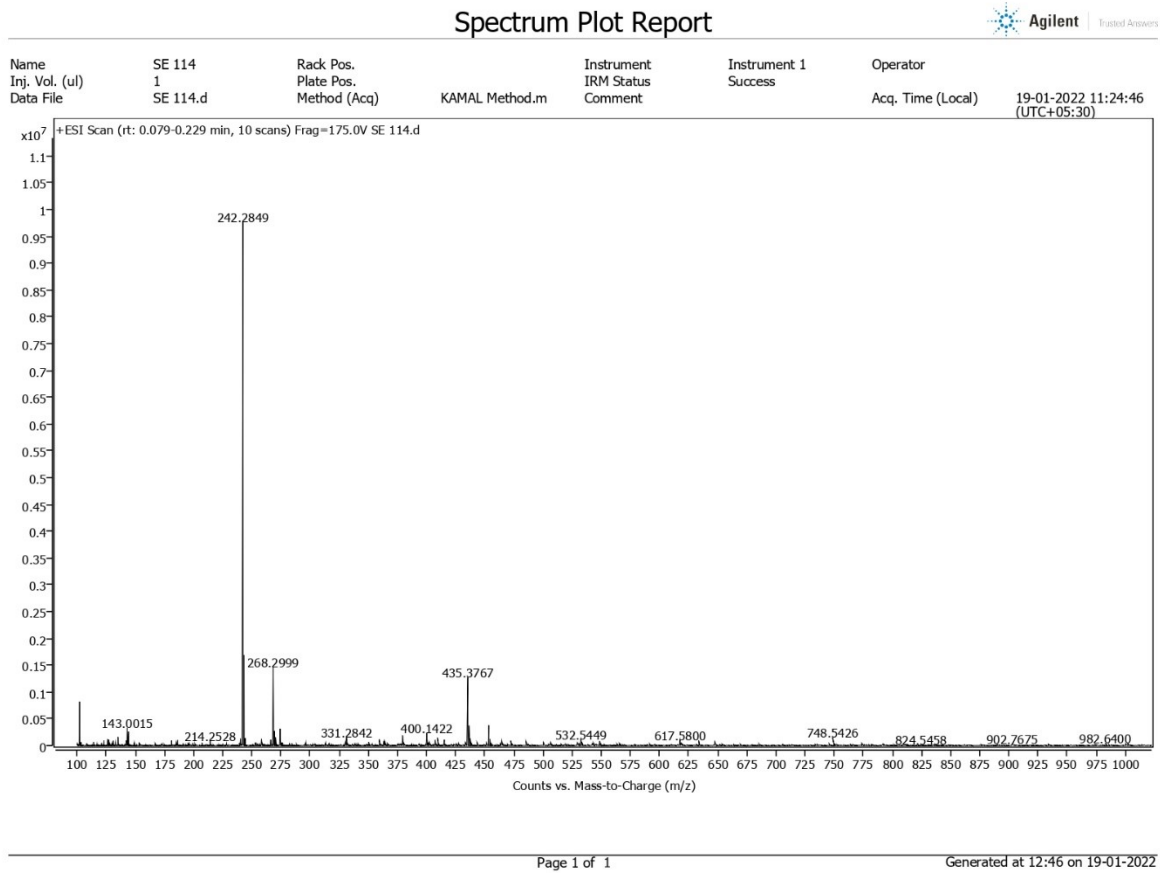

Figure S48: LCMS of Compound 4d.

| Retention Time (MS) | MS Area | Mol. Weight or Ion |
|---------------------|---------|--------------------|
| 5.591               | 1183032 | 400.20 I           |
|                     |         | 399.20 I           |
|                     |         | 398.20 I           |

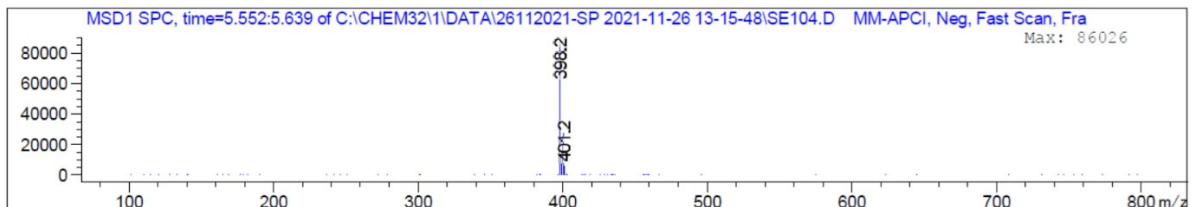

Figure S49: LCMS of Compound 4e.

| Retention Time (MS) | MS Area | Mol. Weight or Ion   |
|---------------------|---------|----------------------|
| 5.187               | 942895  | 395.20 I<br>394.20 I |

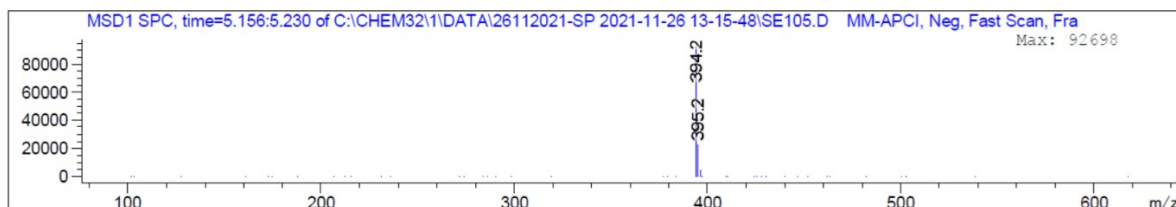

Figure S50: LCMS of Compound 4f.

| Retention Time (MS) | MS Area | Mol. Weight or Ion   |
|---------------------|---------|----------------------|
| 5.152               | 469870  | 395.20 I<br>394.20 I |

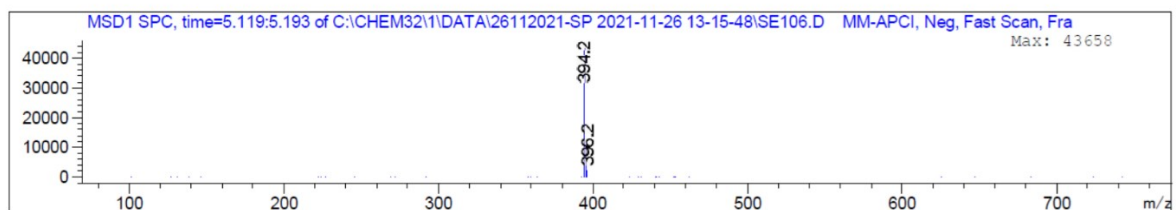

Figure S51: HRMS of Compound 4g.

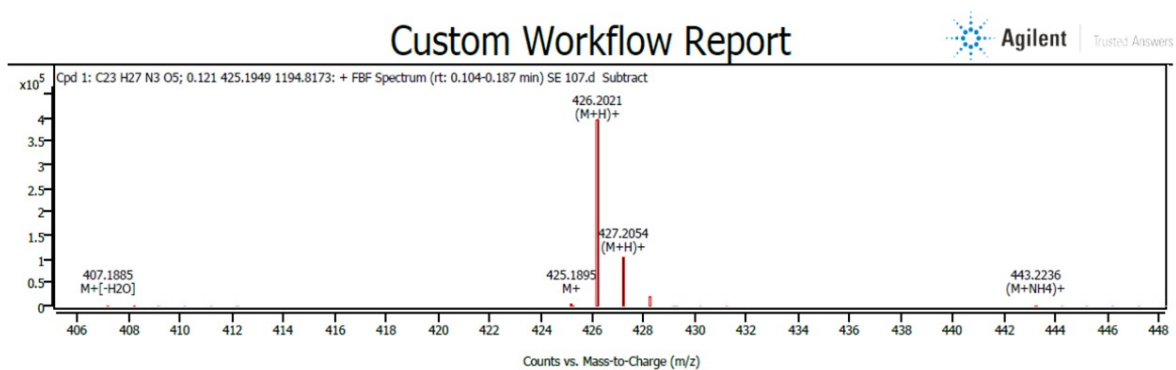

Figure S52: HRMS of Compound 4h.

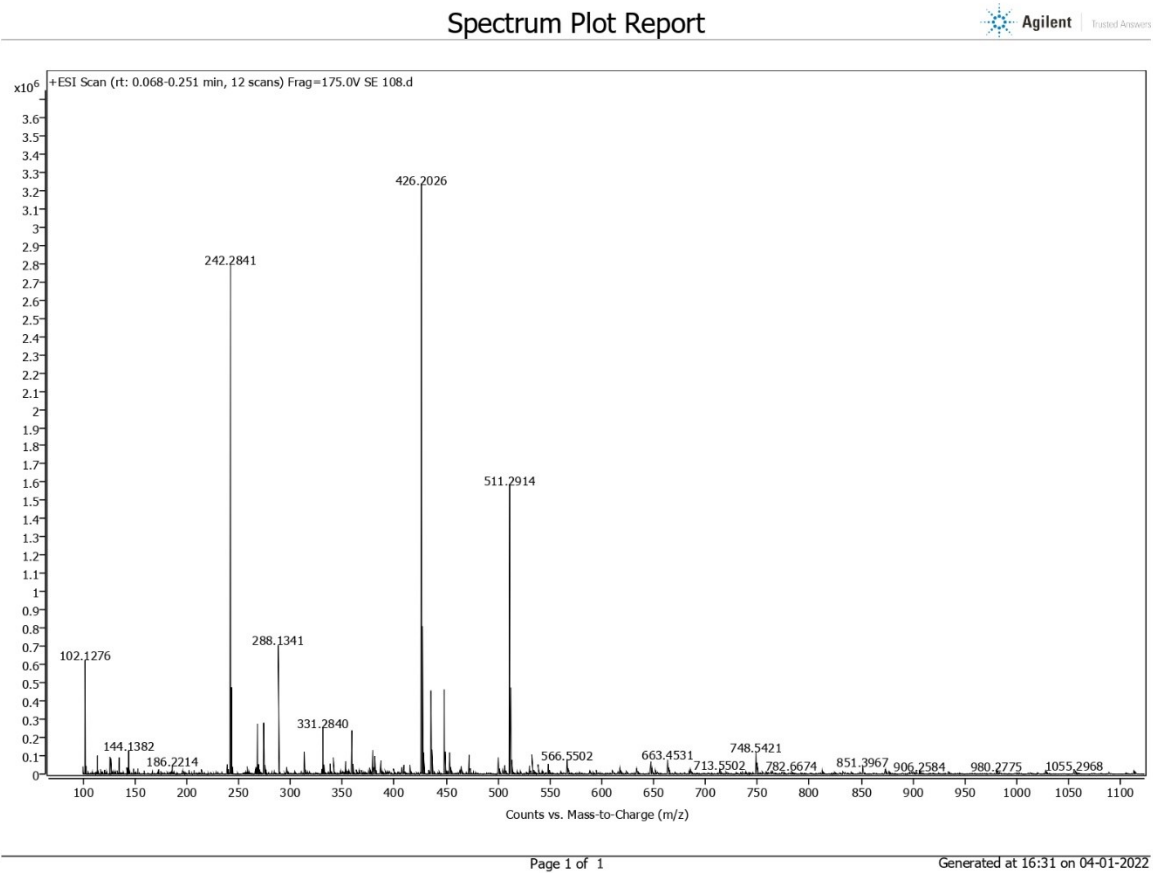

Figure S53: HRMS of Compound 4i.

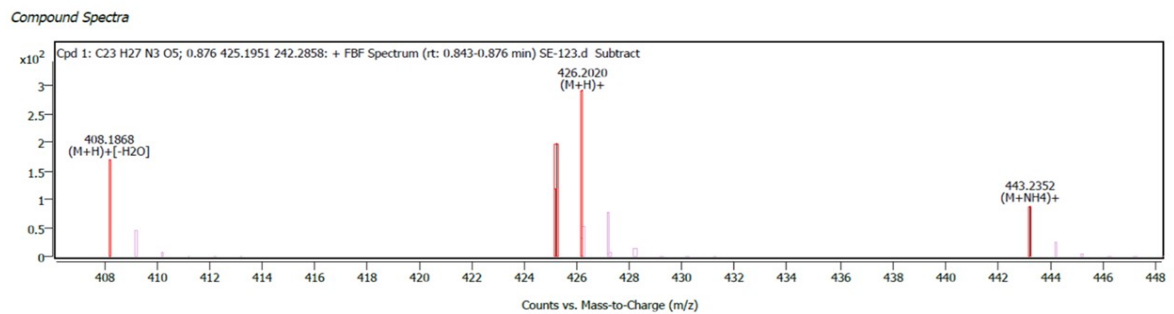

Figure S54: HRMS of Compound 4j.

Spectrum Plot Report

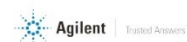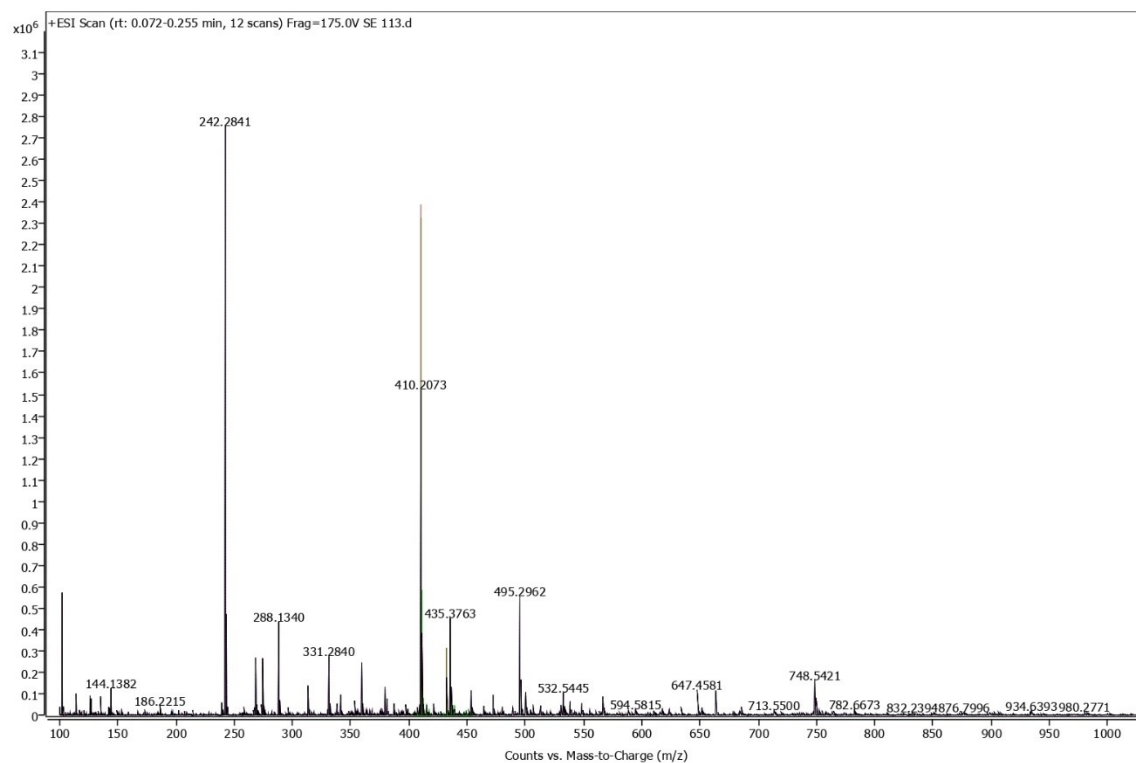

Figure S55: HRMS of Compound 4k.

Compound Spectra

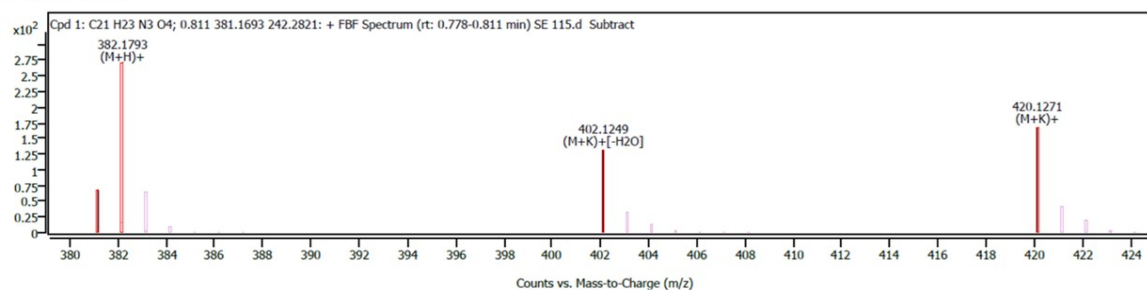

Figure S56: HRMS of Compound 4l.

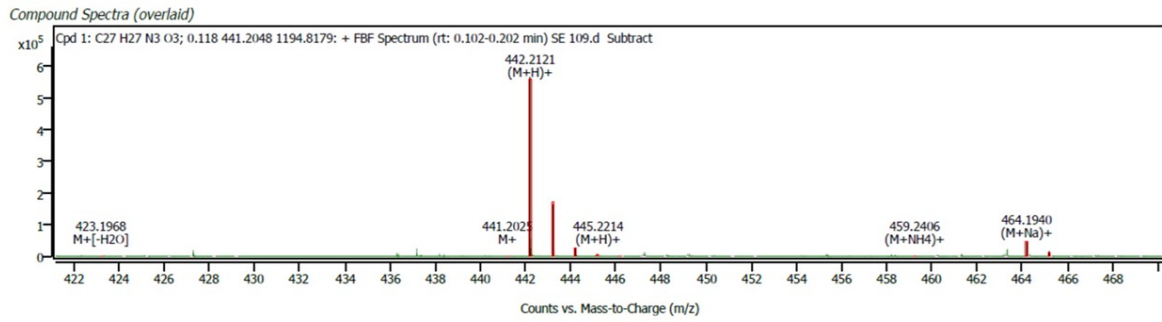

Figure S57: HRMS of Compound 4m.

Spectrum Plot Report

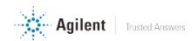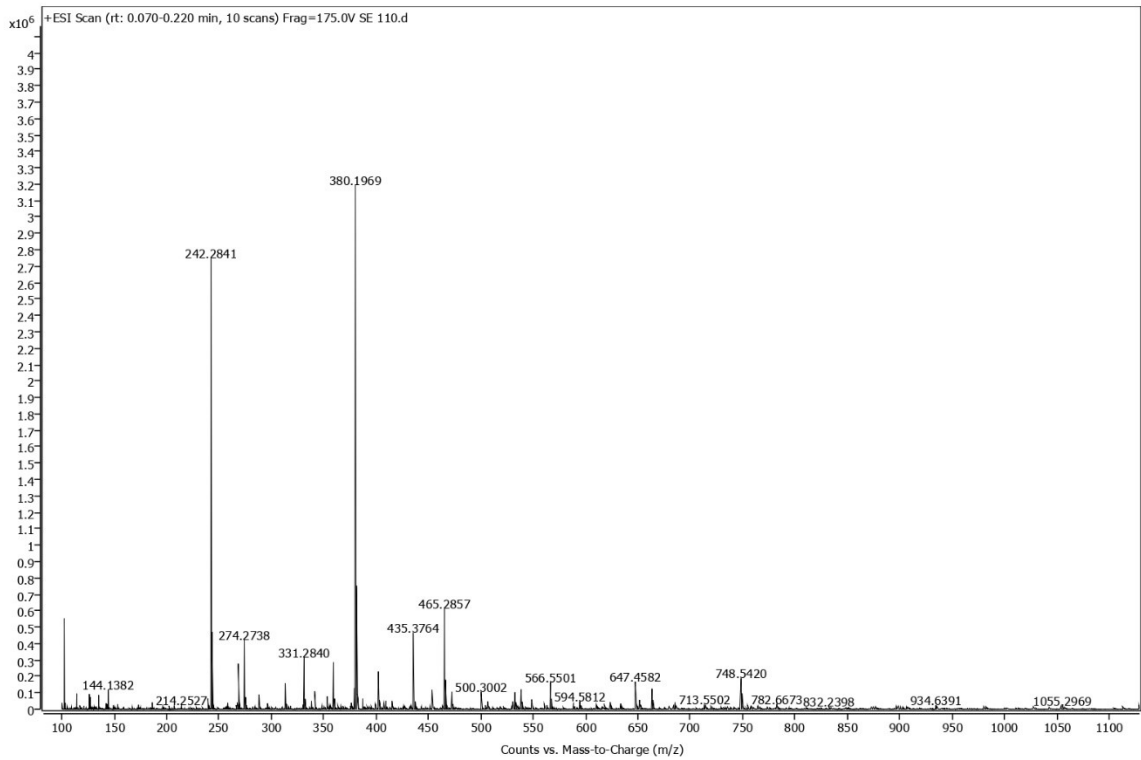

Figure S58: HRMS of Compound 4n.

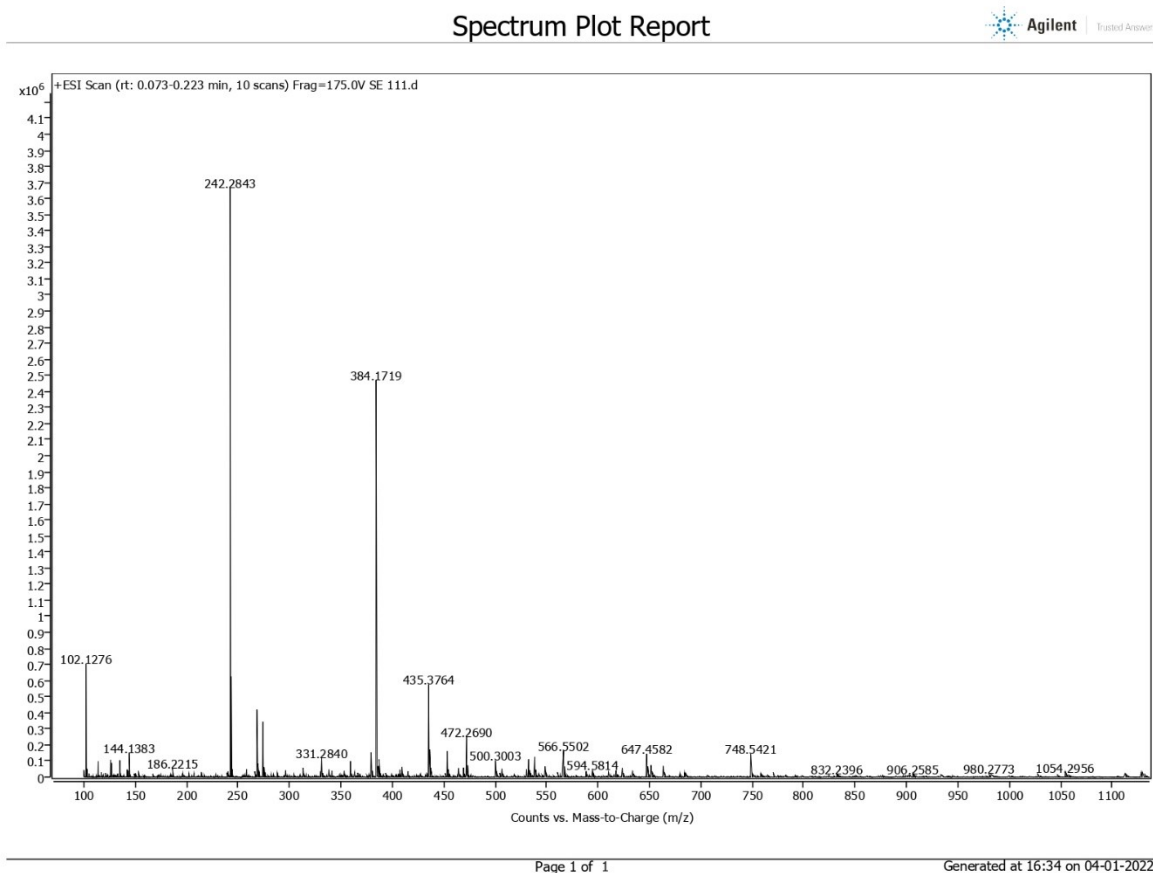

Figure S59: LCMS of Compound 4o.

| Retention Time (MS) | MS Area | Mol. Weight or Ion |
|---------------------|---------|--------------------|
| 5.694               | 3213958 | 445.20 I           |
|                     |         | 445.00 I           |
|                     |         | 444.20 I           |
|                     |         | 444.00 I           |
|                     |         | 443.20 I           |
|                     |         | 442.20 I           |
|                     |         | 442.00 I           |

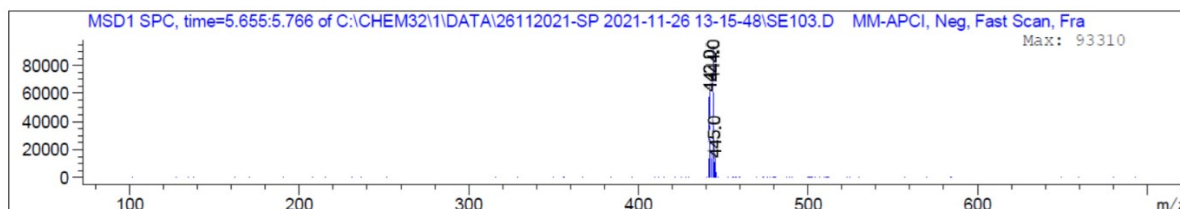

Figure S60: HRMS of Compound 4p.

Spectrum Plot Report

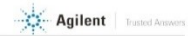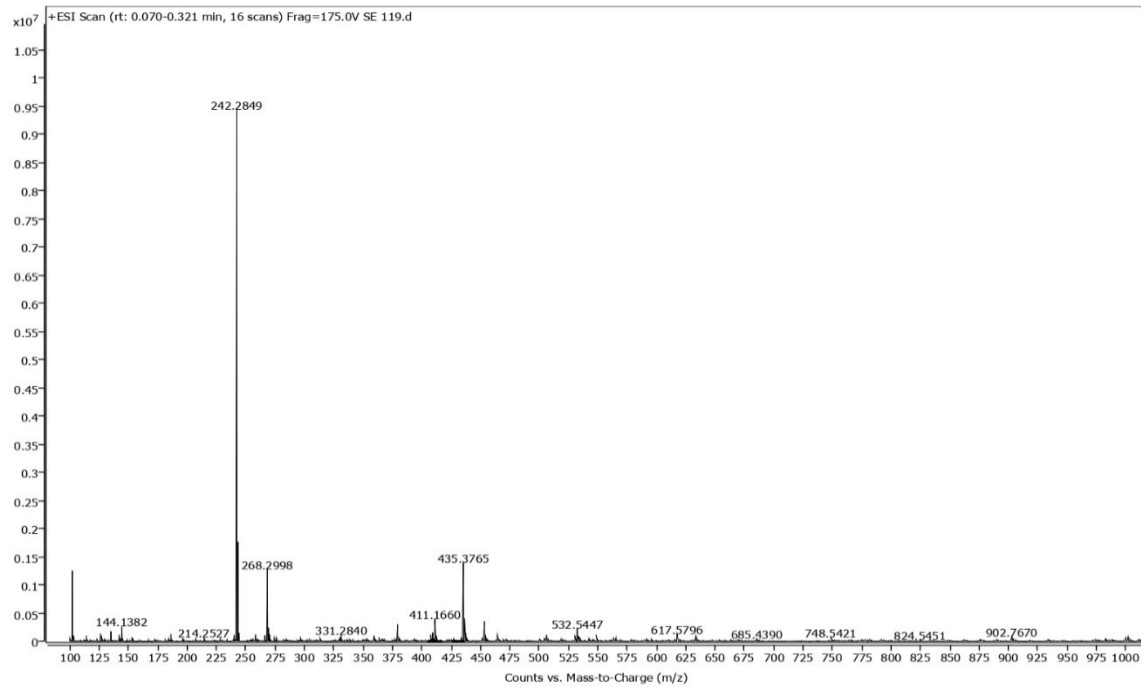

Figure S61: HRMS of Compound 4q.

Spectrum Plot Report

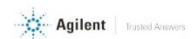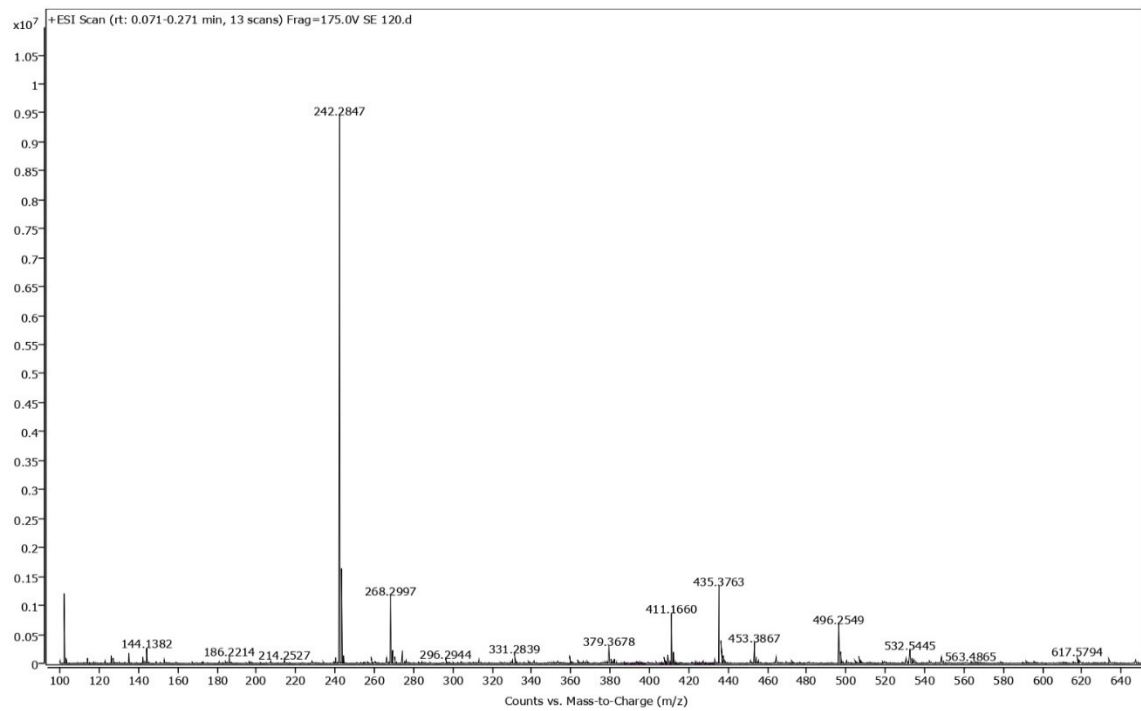

Figure S62: HRMS of Compound 4r.

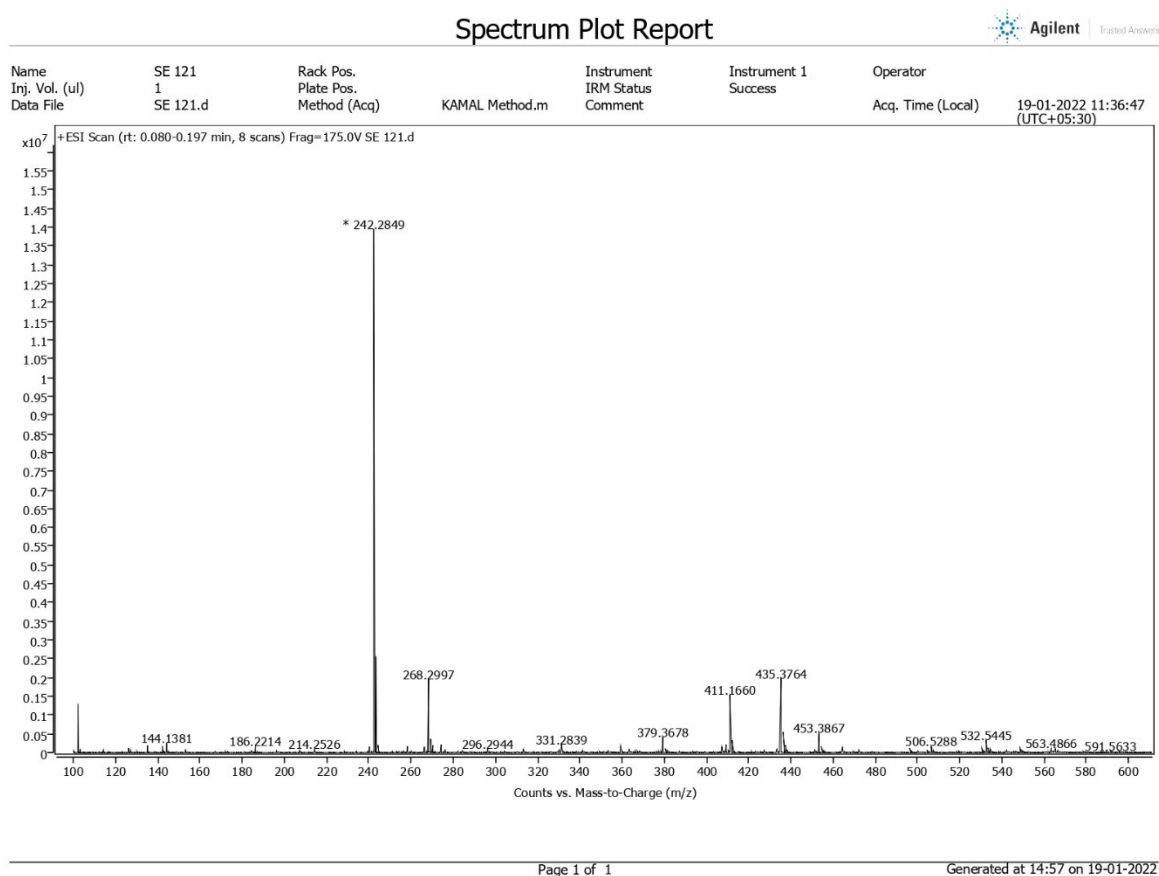

Figure S63: HRMS of Compound 4s.

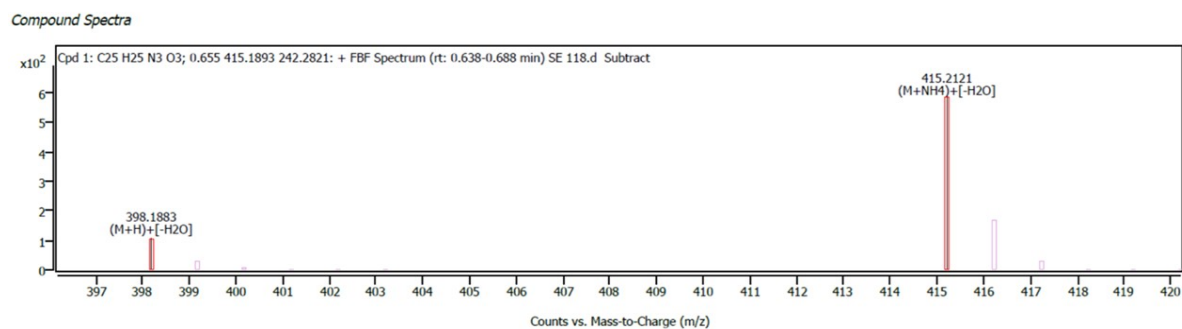



Figure S64: HRMS of Compound 4t.

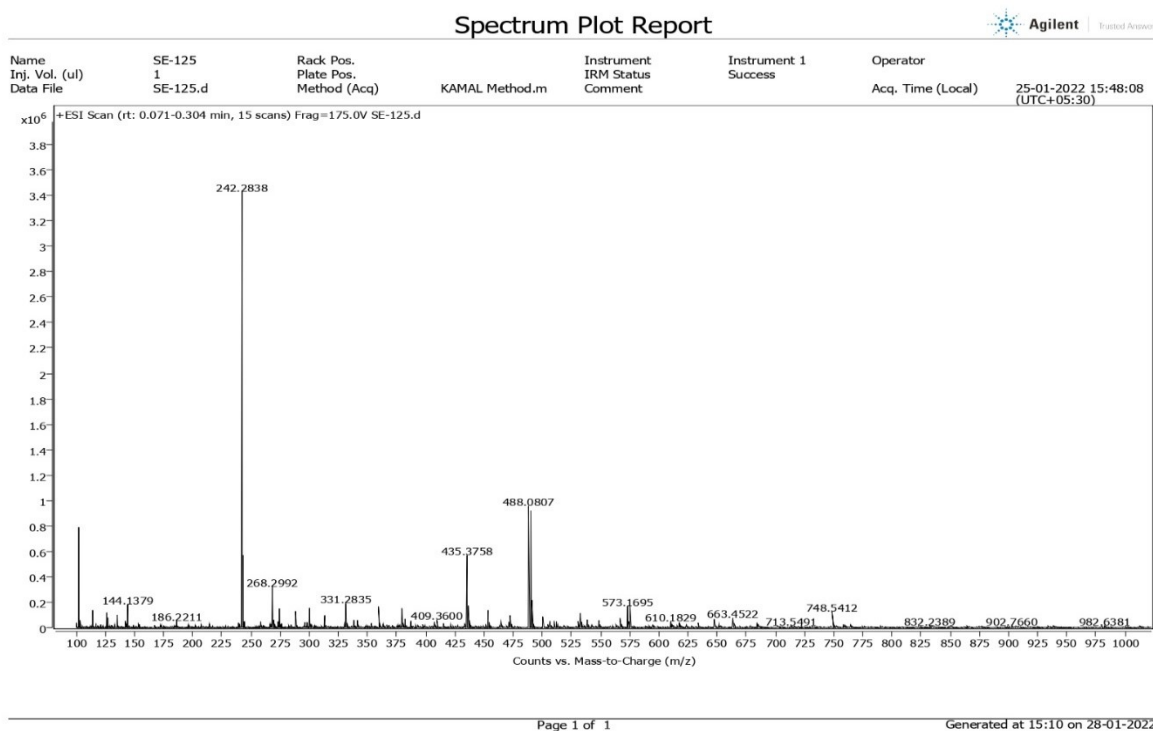

Figure S65: HRMS of Compound 4u.

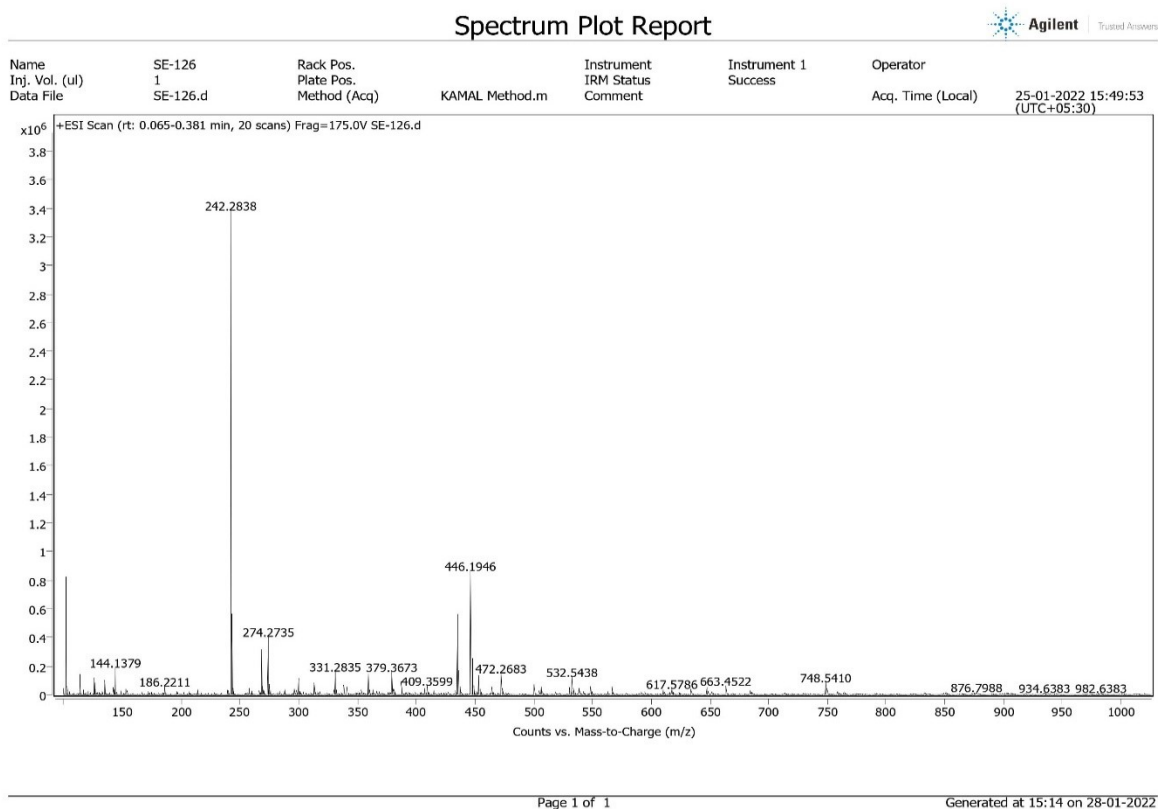

Figure S66: HRMS of Compound 4v.

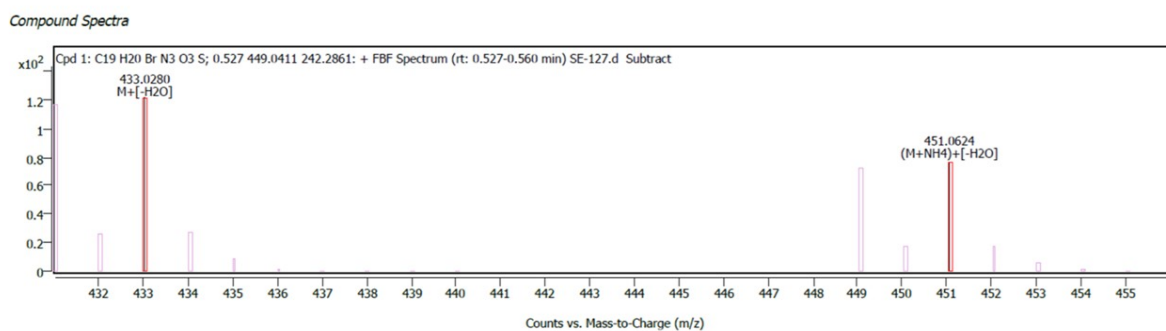

# Crystal X-ray report of compound 4f [CCDC: 2157101].

## checkCIF (basic structural check) running

---

Checking for embedded fcf data in CIF ...

Found embedded fcf data in CIF. Extracting fcf data from uploaded CIF, please wait ...

## checkCIF/PLATON (basic structural check)

---

Structure factors have been supplied for datablock(s) 106

THIS REPORT IS FOR GUIDANCE ONLY. IF USED AS PART OF A REVIEW PROCEDURE FOR PUBLICATION, IT SHOULD NOT REPLACE THE EXPERTISE OF AN EXPERIENCED CRYSTALLOGRAPHIC REFEREE.

No syntax errors found. [CIF dictionary](#)

Please wait while processing .... [Interpreting this report](#)

Structure factor report

## Datablock: 106

---

Bond precision: C-C = 0.0033 Å Wavelength=0.71073

Cell: a=17.3963(6) b=22.485(1) c=14.0877(9)  
alpha=90 beta=127.7461(13) gamma=90

Temperature: 296 K

|                        | Calculated    | Reported      |
|------------------------|---------------|---------------|
| Volume                 | 4357.3(4)     | 4357.3(4)     |
| Space group            | C 2/c         | C 2/c         |
| Hall group             | -C 2yc        | -C 2yc        |
| Moiety formula         | C22 H25 N3 O4 | ?             |
| Sum formula            | C22 H25 N3 O4 | C22 H25 N3 O4 |
| Mr                     | 395.42        | 395.45        |
| Dx, g cm <sup>-3</sup> | 1.206         | 1.206         |
| Z                      | 8             | 8             |
| Mu (mm <sup>-1</sup> ) | 0.084         | 0.084         |
| F000                   | 1679.9        | 1680.0        |
| F000'                  | 1680.63       |               |
| h,k,lmax               | 20, 26, 16    | 20, 26, 16    |
| Nref                   | 3835          | 3835          |
| Tmin, Tmax             | 0.979, 0.984  | 0.979, 0.984  |
| Tmin'                  | 0.979         |               |

Correction method= # Reported T Limits: Tmin=0.979 Tmax=0.984 AbsCorr = MULTI-SCAN

Data completeness= 1.000 Theta(max)= 25.000

R(reflections)= 0.0468( 2826) wR2(reflections)= 0.1368( 3835)

S = 1.045 Npar= 293

---

The following ALERTS were generated. Each ALERT has the format

**test-name\_ALERT\_alert-type\_alert-level.**

Click on the hyperlinks for more details of the test.

---

### **Alert level A**

PLAT601\_ALERT\_2\_A Unit Cell Contains Solvent Accessible VOIDS of . 221 Ang\*\*3

**Author Response: Application of procedure SQUEEZE (program PLATON) did not bring about a significant improvement on refinement and therefore was not retained for the final refinement. The compound is therefore considered as a DESOLVATE with no solvent content.**

---

### **Alert level B**

PLAT919\_ALERT\_3\_B Reflection # Likely Affected by the Beamstop ... 1 Check

**Author Response: The crystal which was studied was small in size and some reflections having small 2theta values, may have been affected by beam stop.**

---

### Alert level C

|                   |                                                  |                           |           |
|-------------------|--------------------------------------------------|---------------------------|-----------|
| PLAT220_ALERT_2_C | NonSolvent Resd 1 C                              | Ueq(max)/Ueq(min) Range   | 3.8 Ratio |
| PLAT222_ALERT_3_C | NonSolvent Resd 1 H                              | Uiso(max)/Uiso(min) Range | 4.4 Ratio |
| PLAT241_ALERT_2_C | High 'MainMol' Ueq as Compared to Neighbors of   |                           | C15 Check |
| PLAT242_ALERT_2_C | Low 'MainMol' Ueq as Compared to Neighbors of    |                           | O2 Check  |
| PLAT242_ALERT_2_C | Low 'MainMol' Ueq as Compared to Neighbors of    |                           | C17 Check |
| PLAT334_ALERT_2_C | Small Aver. Benzene C-C Dist C14 -C19            |                           | 1.37 Ang. |
| PLAT934_ALERT_3_C | Number of (Iobs-Icalc)/Sigma(W) > 10 Outliers .. |                           | 1 Check   |

### Alert level G

|                   |                                                  |             |              |
|-------------------|--------------------------------------------------|-------------|--------------|
| PLAT066_ALERT_1_G | Predicted and Reported Tmin&Tmax Range Identical |             | ? Check      |
| PLAT068_ALERT_1_G | Reported F000 Differs from Calcd (or Missing)... |             | Please Check |
| PLAT128_ALERT_4_G | Alternate Setting for Input Space Group C2/c     |             | I2/a Note    |
| PLAT301_ALERT_3_G | Main Residue Disorder .....(Resd 1 )             |             | 7% Note      |
| PLAT398_ALERT_2_G | Deviating C-O-C Angle From 120 for O3            |             | 109.4 Degree |
| PLAT398_ALERT_2_G | Deviating C-O-C Angle From 120 for O3A           |             | 108.8 Degree |
| PLAT413_ALERT_2_G | Short Inter XH3 .. XHn H21C ..H22C               |             | 1.99 Ang.    |
|                   | 1/2-x,3/2-y,1-z =                                | 7_566 Check |              |
| PLAT793_ALERT_4_G | Model has Chirality at C7 (Centro SPGR)          |             | R Verify     |
| PLAT860_ALERT_3_G | Number of Least-Squares Restraints .....         |             | 1 Note       |
| PLAT883_ALERT_1_G | No Info/Value for _atom_sites_solution_primary   |             | Please Do !  |
| PLAT909_ALERT_3_G | Percentage of I>2sig(I) Data at Theta(Max) Still |             | 43% Note     |
| PLAT941_ALERT_3_G | Average HKL Measurement Multiplicity .....       |             | 4.5 Low      |
| PLAT965_ALERT_2_G | The SHELXL WEIGHT Optimisation has not Converged |             | Please Check |
| PLAT967_ALERT_5_G | Note: Two-Theta Cutoff Value in Embedded .res .. |             | 50.0 Degree  |
| PLAT978_ALERT_2_G | Number C-C Bonds with Positive Residual Density. |             | 4 Info       |

- 1 **ALERT level A** = Most likely a serious problem - resolve or explain  
1 **ALERT level B** = A potentially serious problem, consider carefully  
7 **ALERT level C** = Check. Ensure it is not caused by an omission or oversight  
15 **ALERT level G** = General information/check it is not something unexpected

- 3 ALERT type 1 CIF construction/syntax error, inconsistent or missing data  
11 ALERT type 2 Indicator that the structure model may be wrong or deficient  
7 ALERT type 3 Indicator that the structure quality may be low  
2 ALERT type 4 Improvement, methodology, query or suggestion  
1 ALERT type 5 Informative message, check

It is advisable to attempt to resolve as many as possible of the alerts in all categories. Often the minor alerts point to easily fixed oversights, errors and omissions in your CIF or refinement strategy, so attention to these fine details can be worthwhile. In order to resolve some of the more serious problems it may be necessary to carry out additional measurements or structure refinements. However, the purpose of your study may justify the reported deviations and the more serious of these should normally be commented upon in the discussion or experimental section of a paper or in the "special\_details" fields of the CIF. checkCIF was carefully designed to identify outliers and unusual parameters, but every test has its limitations and alerts that are not important in a particular case may appear. Conversely, the absence of alerts does not guarantee there are no aspects of the results needing attention. It is up to the individual to critically assess their own results and, if necessary, seek expert advice.

#### Publication of your CIF in IUCr journals

A basic structural check has been run on your CIF. These basic checks will be run on all CIFs submitted for publication in IUCr journals (*Acta Crystallographica*, *Journal of Applied Crystallography*, *Journal of Synchrotron Radiation*); however, if you intend to submit to *Acta Crystallographica Section C* or *E* or *IUCrData*, you should make sure that **full publication checks** are run on the final version of your CIF prior to submission.

#### Publication of your CIF in other journals

Please refer to the *Notes for Authors* of the relevant journal for any special instructions relating to CIF submission.

PLATON version of 19/02/2022; check.def file version of 19/02/2022

### Datablock 106 - ellipsoid plot

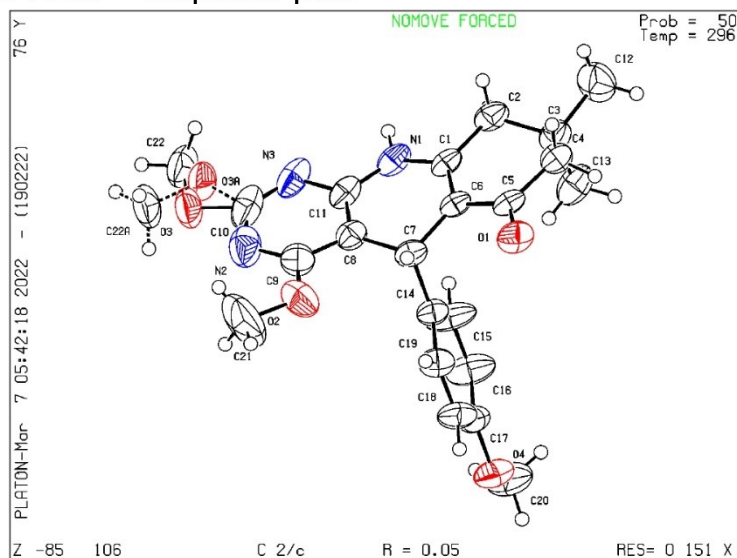

# Crystal X-ray report of compound **4o** [CCDC: 2149724].

## checkCIF (basic structural check) running

Checking for embedded fcf data in CIF ...

Found embedded fcf data in CIF. Extracting fcf data from uploaded CIF, please wait . .

## checkCIF/PLATON (basic structural check)

Structure factors have been supplied for datablock(s) 103

THIS REPORT IS FOR GUIDANCE ONLY. IF USED AS PART OF A REVIEW PROCEDURE FOR PUBLICATION, IT SHOULD NOT REPLACE THE EXPERTISE OF AN EXPERIENCED CRYSTALLOGRAPHIC REFEREE.

No syntax errors found. [CIF dictionary](#)

Please wait while processing .... [Interpreting this report](#)

Structure factor report

## Datablock: 103

Bond precision: C-C = 0.0032 Å Wavelength=0.71073  
Cell: a=6.0680(2) b=13.0347(5) c=13.5866(5)  
alpha=103.302(3) beta=95.6327(18) gamma=103.2902(19)

Temperature: 296 K

|                        | Calculated       | Reported         |
|------------------------|------------------|------------------|
| Volume                 | 1004.76(7)       | 1004.76(7)       |
| Space group            | P -1             | P -1             |
| Hall group             | -P 1             | -P 1             |
| Moiety formula         | C21 H22 Br N3 O3 | ?                |
| Sum formula            | C21 H22 Br N3 O3 | C21 H22 Br N3 O3 |
| Mr                     | 444.32           | 444.32           |
| Dx, g cm <sup>-3</sup> | 1.469            | 1.469            |
| Z                      | 2                | 2                |
| Mu (mm <sup>-1</sup> ) | 2.072            | 2.072            |
| F000                   | 456.0            | 456.0            |
| F000'                  | 455.60           |                  |
| h, k, lmax             | 7, 15, 16        | 7, 15, 16        |
| Nref                   | 3554             | 3531             |
| Tmin, Tmax             | 0.602, 0.813     | 0.625, 0.820     |
| Tmin'                  | 0.590            |                  |

Correction method= # Reported T Limits: Tmin=0.625 Tmax=0.820 AbsCorr = MULTI-SCAN

Data completeness= 0.994 Theta(max)= 24.993

R(reflections)= 0.0315( 2771) wR2(reflections)= 0.0762( 3531)

S = 1.029 Npar= 261

The following ALERTS were generated. Each ALERT has the format

**test-name\_ALERT\_alert-type\_alert-level.**

Click on the hyperlinks for more details of the test.

### Alert level C

PLAT911\_ALERT\_3\_C Missing FCF Refl Between Thmin & STh/L= 0.594 24 Report

### Alert level G

|                                                                    |              |
|--------------------------------------------------------------------|--------------|
| PLAT793_ALERT_4_G Model has Chirality at C8 (Centro SPGR)          | S Verify     |
| PLAT883_ALERT_1_G No Info/Value for _atom_sites_solution_primary . | Please Do !  |
| PLAT909_ALERT_3_G Percentage of I>2sig(I) Data at Theta(Max) Still | 50% Note     |
| PLAT941_ALERT_3_G Average HKL Measurement Multiplicity .....       | 3.9 Low      |
| PLAT965_ALERT_2_G The SHELXL WEIGHT Optimisation has not Converged | Please Check |
| PLAT967_ALERT_5_G Note: Two-Theta Cutoff Value in Embedded .res .. | 50.0 Degree  |
| PLAT978_ALERT_2_G Number C-C Bonds with Positive Residual Density. | 9 Info       |

0 **ALERT level A** = Most likely a serious problem - resolve or explain

0 **ALERT level B** = A potentially serious problem, consider carefully

1 **ALERT level C** = Check. Ensure it is not caused by an omission or oversight  
7 **ALERT level G** = General information/check it is not something unexpected

- 1 ALERT type 1 CIF construction/syntax error, inconsistent or missing data
- 2 ALERT type 2 Indicator that the structure model may be wrong or deficient
- 3 ALERT type 3 Indicator that the structure quality may be low
- 1 ALERT type 4 Improvement, methodology, query or suggestion
- 1 ALERT type 5 Informative message, check

It is advisable to attempt to resolve as many as possible of the alerts in all categories. Often the minor alerts point to easily fixed oversights, errors and omissions in your CIF or refinement strategy, so attention to these fine details can be worthwhile. In order to resolve some of the more serious problems it may be necessary to carry out additional measurements or structure refinements. However, the purpose of your study may justify the reported deviations and the more serious of these should normally be commented upon in the discussion or experimental section of a paper or in the "special\_details" fields of the CIF. checkCIF was carefully designed to identify outliers and unusual parameters, but every test has its limitations and alerts that are not important in a particular case may appear. Conversely, the absence of alerts does not guarantee there are no aspects of the results needing attention. It is up to the individual to critically assess their own results and, if necessary, seek expert advice.

#### Publication of your CIF in IUCr journals

A basic structural check has been run on your CIF. These basic checks will be run on all CIFs submitted for publication in IUCr journals (*Acta Crystallographica*, *Journal of Applied Crystallography*, *Journal of Synchrotron Radiation*); however, if you intend to submit to *Acta Crystallographica Section C* or *E* or *IUCrData*, you should make sure that **full publication checks** are run on the final version of your CIF prior to submission.

#### Publication of your CIF in other journals

Please refer to the *Notes for Authors* of the relevant journal for any special instructions relating to CIF submission.

PLATON version of 19/02/2022; check.def file version of 19/02/2022

### Datablock 103 - ellipsoid plot

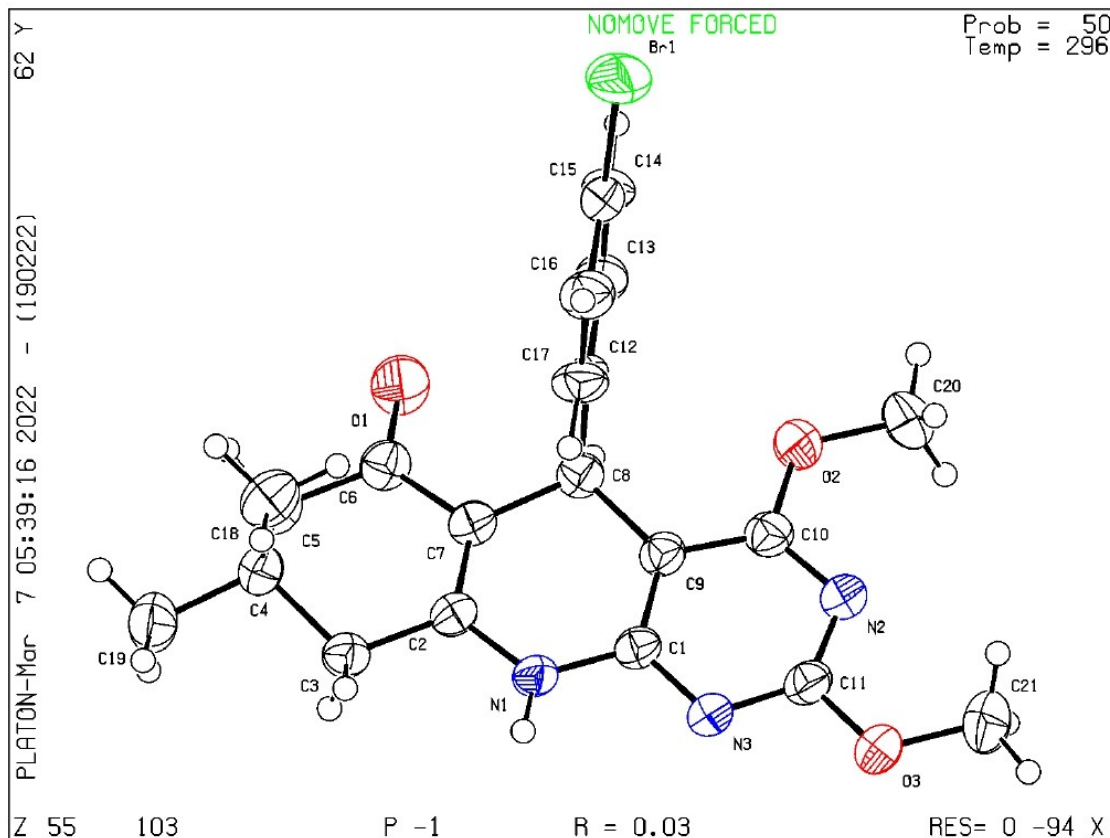

#### 4. Green chemistry metrics analysis

The following formulae were used for calculating Atom Economy (AE), Atom Efficiency (AEf), Carbon Efficiency (CE), Reaction Mass Efficiency (RME), Optimum Efficiency (OE), Mass Productivity (MP), Mass Intensity (MI) and Process Mass Intensity (PMI), E factor, Solvent and Water Intensity (SI and WI).

$$AE = \frac{\text{Molecular weight of product}}{\text{Total molecular weight of reactants}} \times 100$$

$$AEf = AE \times \% \text{yield}$$

$$CE = \frac{\text{Amount of carbon in the product}}{\text{Total carbon present in the reactant}} \times 100$$

$$RME = \frac{\text{Mass of isolated product}}{\text{Total mass of reactant}} \times 100$$

$$OE = \frac{RME}{AE} \times 100$$

$$PMI = \frac{\text{Total mass of input material in the whole process}}{\text{Mass of product}}$$

$$MP = \frac{1}{PMI} \times 100$$

$$E \text{ Factor} = PMI - 1$$

$$SI = \frac{\text{Total mass of solvents excluding water in the whole process}}{\text{Mass of product}}$$

$$WI = \frac{\text{Total mass of water in the whole process}}{\text{Mass of product}}$$

#### 4.1. Green chemistry metrics analysis for conventional method

Materials used for metrics calculations: 4-Chlorobenzaldehyde **1a** (140 mg, 1 mmol), Dimedone **2** (140 mg, 1 mmol), 6-amino-2,4-dimethoxypyrimidine **3** (155 mg, 1 mmol), Product **4a** (290 mg, 0.73 mmol), Acetic acid (3.147 g, 3 mL), water (20 g, 20 mL), diethyl ether (3.57 g, 5 mL), petroleum ether (3.35 g, 5 mL).

$$AE = \frac{399.88}{140.57 + 140.18 + 155.15} \times 100 = \frac{399.88}{435.9} \times 100 = 91.74$$

$$AEf = 91.74 \times 73\% = 66.97$$

$$CE = \frac{21 \times 0.0007252}{7 \times 0.001 + 8 \times 0.001 + 6 \times 0.001} \times 100 = 72.52$$

$$RME = \frac{290}{435} \times 100 = 66.67$$

$$OE = \frac{66.67}{91.74} \times 100 = 72.67$$

$$PMI = \frac{30.50}{0.290} = 105.17$$

$$MP = \frac{1}{105.17} \times 100 = 0.95$$

$$E \text{ Factor} = 105.17 - 1 = 104.17$$

$$SI = \frac{3.147 + 3.57 + 3.35}{0.290} = 34.71$$

$$WI = \frac{20}{0.290} = 68.97$$



#### 4.2. Green chemistry metrics analysis for microwave method

Materials used for metrics calculations: 4-Chlorobenzaldehyde **1a** (140 mg, 1 mmol), Dimedone **2** (140 mg, 1 mmol), 6-amino-2,4-dimethoxypyrimidine **3** (155 mg, 1 mmol), Product **4a** (333 mg, 0.83 mmol), Acetic acid (3.147 g, 3 mL), water (20 g, 20 mL), diethyl ether (3.57 g, 5 mL), petroleum ether (3.35 g, 5 mL).

$$AE = \frac{399.88}{140.57 + 140.18 + 155.15} \times 100 = \frac{399.88}{435.9} \times 100 = 91.74$$

$$AEf = 91.74 \times 84\% = 77.06$$

$$CE = \frac{21 \times 0.0008328}{7 \times 0.001 + 8 \times 0.001 + 6 \times 0.001} \times 100 = 83.28$$

$$RME = \frac{333}{435} \times 100 = 76.55$$

$$OE = \frac{76.55}{91.74} \times 100 = 83.44$$

$$PMI = \frac{30.50}{0.333} = 91.59$$

$$MP = \frac{1}{91.59} \times 100 = 1.09$$

$$E \text{ Factor} = 91.59 - 1 = 90.59$$

$$SI = \frac{3.147 + 3.57 + 3.35}{0.333} = 30.23$$

$$WI = \frac{20}{0.333} = 60.06$$
